# Supplementary material for: IL-33-ST2 axis regulates myeloid cell differentiation and activation enabling effective club cell regeneration
Source: PubMed Central journal article supplement (PMC7508874; doi:10.1038/s41467-020-18466-w), 2020-09-22
Supplement: 41467_2020_18466_MOESM1_ESM.pdf [file 41467_2020_18466_MOESM1_ESM.pdf]

**IL-33-ST2 axis regulates myeloid cell differentiation and activation  
enabling effective club cell regeneration**

Dagher R, Copenhaver AM, Besnard V, Berlin A, Hamidi F, Maret M, Wang J, Qu X, Shrestha Y,  
Wu J, Gautier G, Raja R, Aubier M, Kolbeck R, Humbles AA and Pretolani M

**Supplementary information**

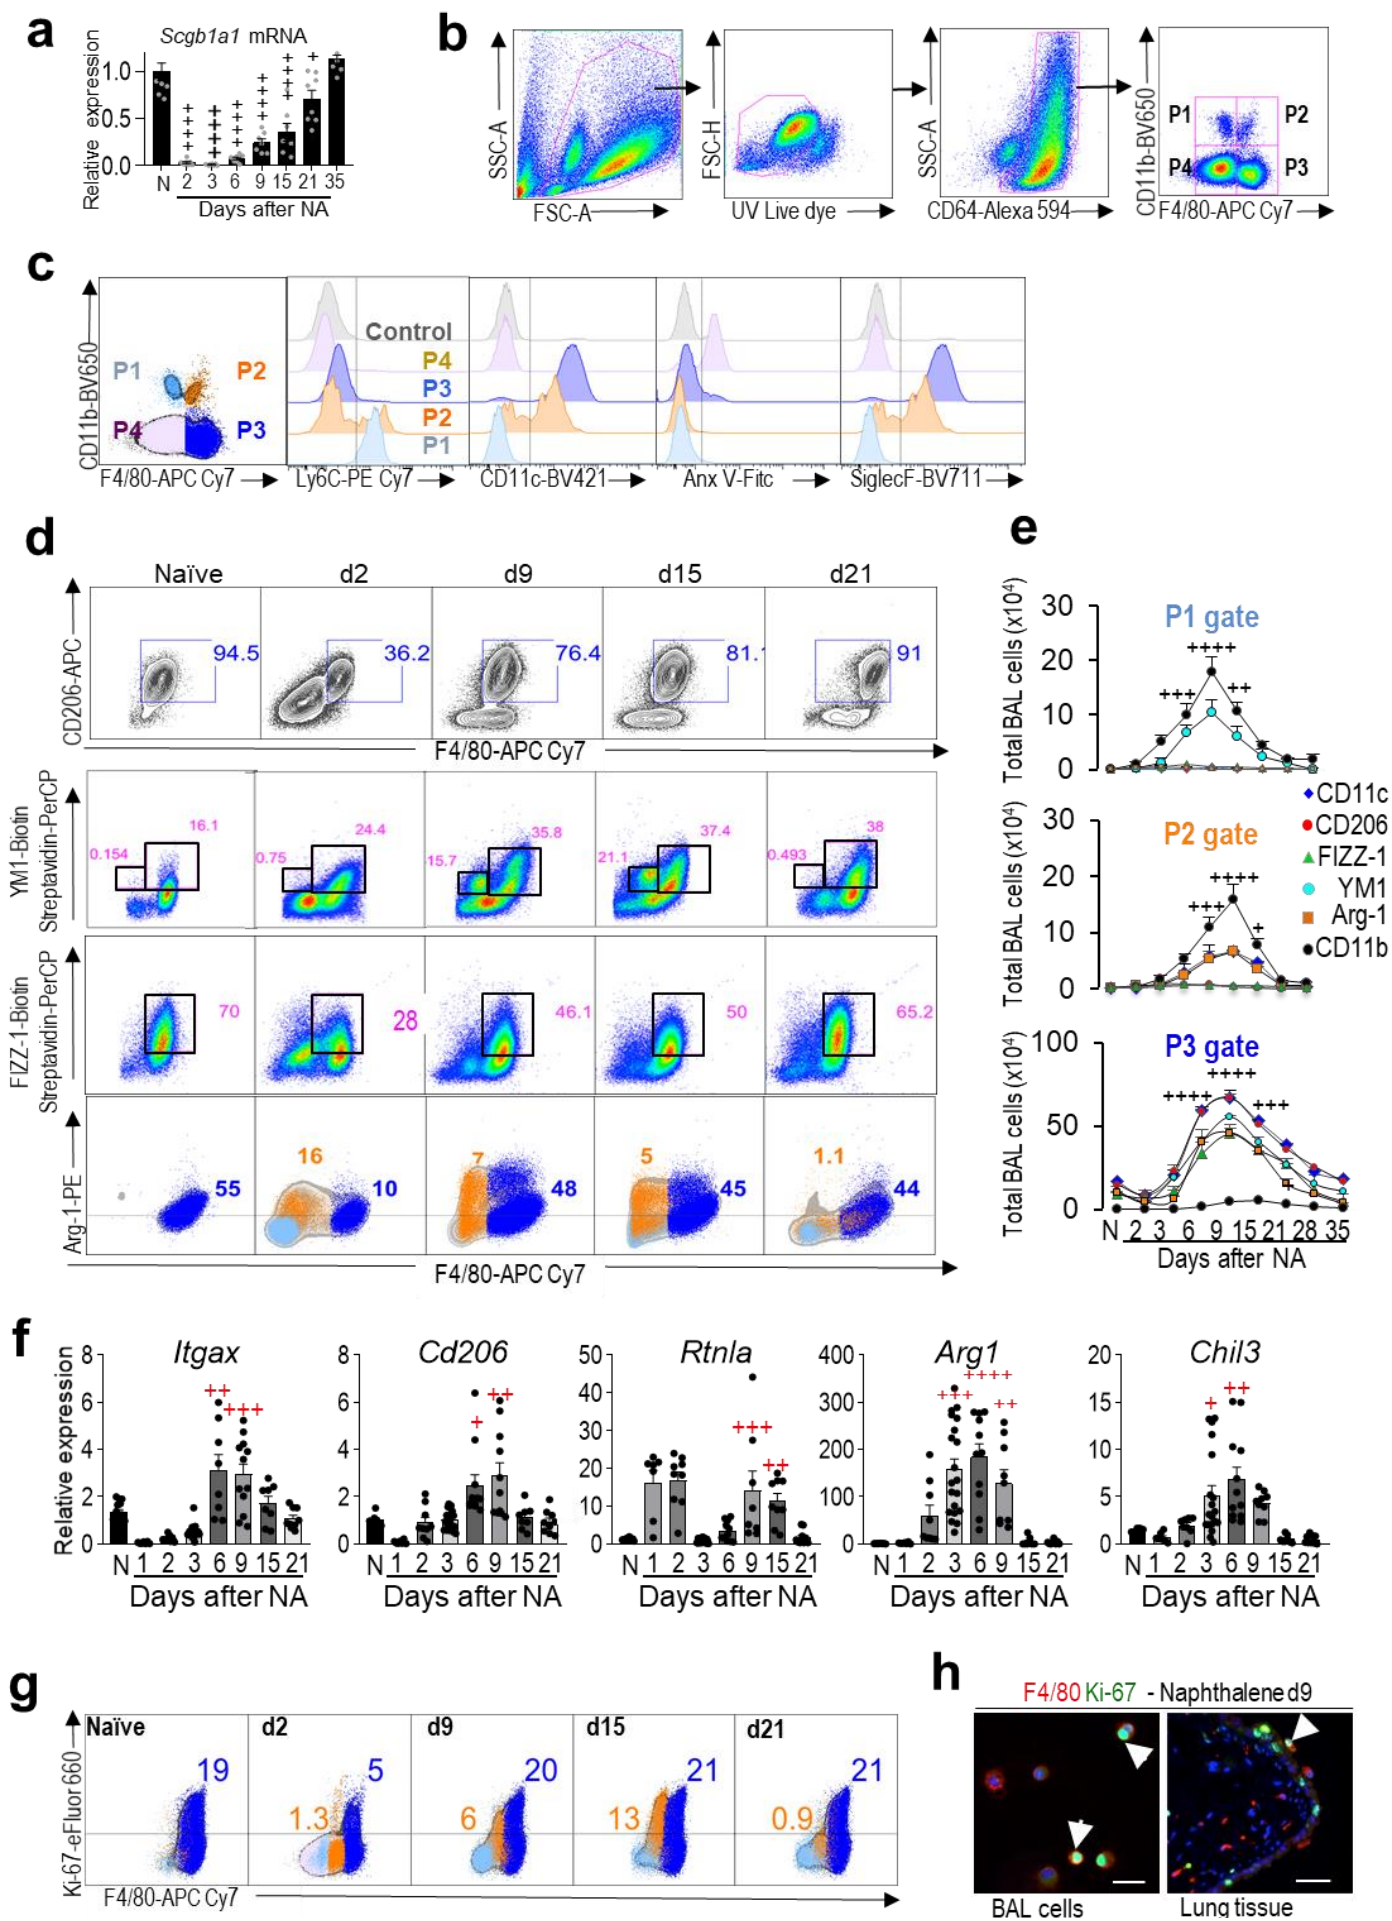

**Supplementary Figure 1. Myeloid cell phenotyping in BAL and lung in the airways of NA-injured mice.**

WT mice were either naïve (N) or treated with NA. Lung cells and BAL cells were analyzed at various days after NA administration. **(a)** Levels of *Scgb1a1* mRNA in total lung homogenates from NA-treated WT mice euthanized at the indicated time points. **(b-c)** Gating strategy for determining and quantifying the phenotype of monocyte/macrophage and subsets from total bronchoalveolar lavage (BAL) cells in Figures 1 (g-i), 2d, 4b, 5c and 9g. **(c)** Representative expression of Ly6C, CD11c, SiglecF and Annexin V (Anx V) on the BAL P1-P4 subsets as determined by flow cytometry. **(d)** Representative flow cytometric plots of CD206, F4/80, YM1, FIZZ-1, and Arg-1 expression on BAL cells. Numbers next to flow gates denote percentage of cells positive for the indicated markers. **(e)** Quantification of total numbers of P1, P2, or P3 BAL populations positive for CD11c, CD206, FIZZ-1, YM1, Arg-1, or CD11b. Data are represented as percentage. **(f)** Quantification of mRNA expression from BAL cells for the indicated transcripts. Flow plots are representative. All graphs show individual mice as dots or squares with lines at the mean. **(g)** F4/80 and Ki-67 staining on P1-P3 BAL populations. **(h)** F4/80 (red), Ki-67 (green), and DAPI (blue) immunofluorescent staining of cytopins (BAL cells, left panel) or lung tissue sections (right panel) on day 9 of naphthalene treatment. Bar graphs from n=8 (a), 5 (e) and 8 (f) mice, show mean  $\pm$  SEM pooled from three independent experiments. \* $P < 0.05$ , \*\* $P < 0.01$ , \*\*\* $P < 0.001$  and \*\*\*\* $P < 0.0001$  between NA-treated and naïve WT mice using One-Way ANOVA, Bonferroni post-test. Scale bar in h = 20  $\mu$ m.

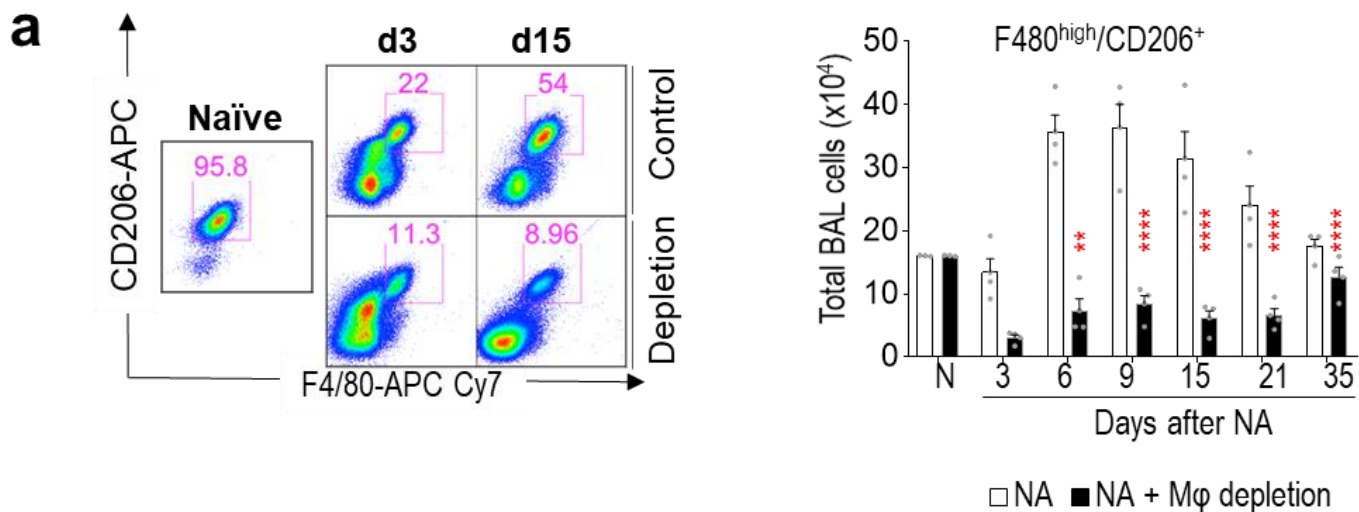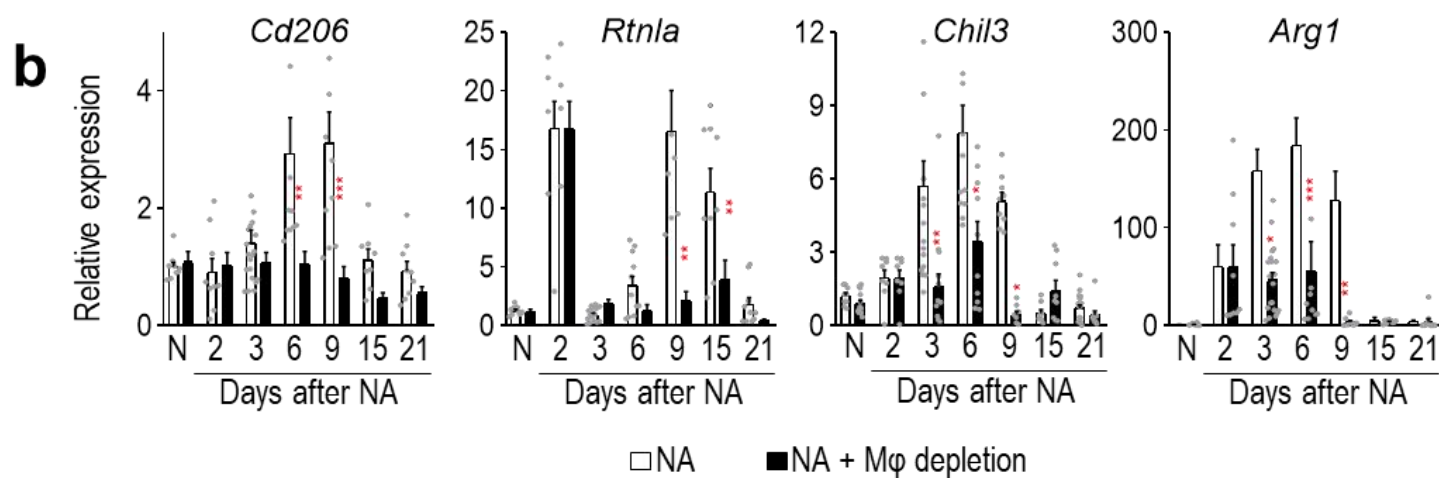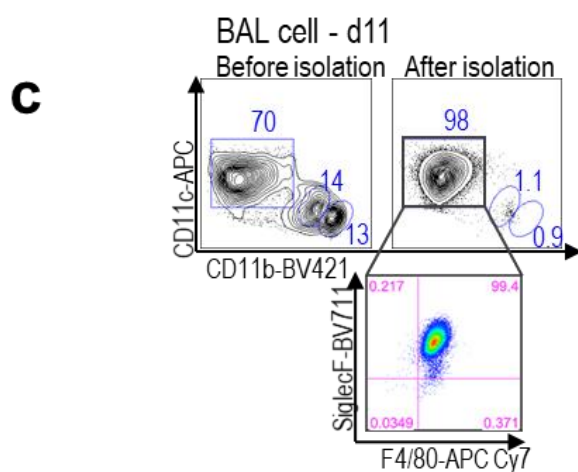

**Supplementary Figure 2. Airway macrophage depletion in NA-injured mice.**

**(a)** Representative flow cytometric plots showing the frequency of CD206<sup>+</sup> F4/80<sup>+</sup> cells in naïve (N), NA-treated WT mice (Control) or NA-injected mice treated with clodronate liposomes (depleted). Numbers denote percentage of cells in gates. In the right panel, quantification of total numbers of CD206<sup>+</sup> F4/80<sup>+</sup> cells as gated in the representative FACS plots. **(b)** Quantification of mRNA for the indicated transcripts. **(c)** Representative flow plots showing the frequency of cells used for adoptive transfer as percentage of P3 AAMs before isolation and after isolation. Bar graphs from n=4 (a) and 8 (b) mice, show mean ± SEM pooled from three independent experiments. \**P* < 0.05, \*\**P* < 0.01, \*\*\**P* < 0.001 and \*\*\*\**P* < 0.0001 between macrophage-depleted and NA-treated WT mice using Two-Way ANOVA, Bonferroni post-test.

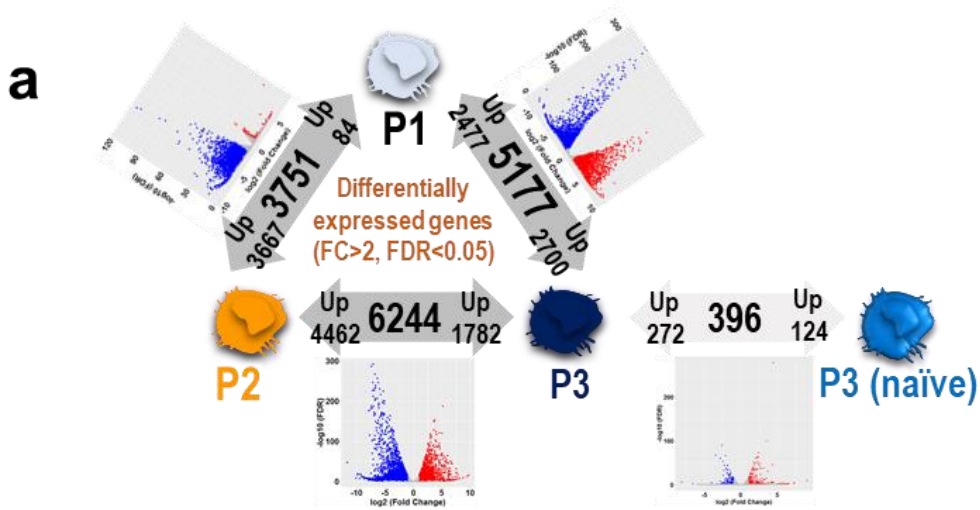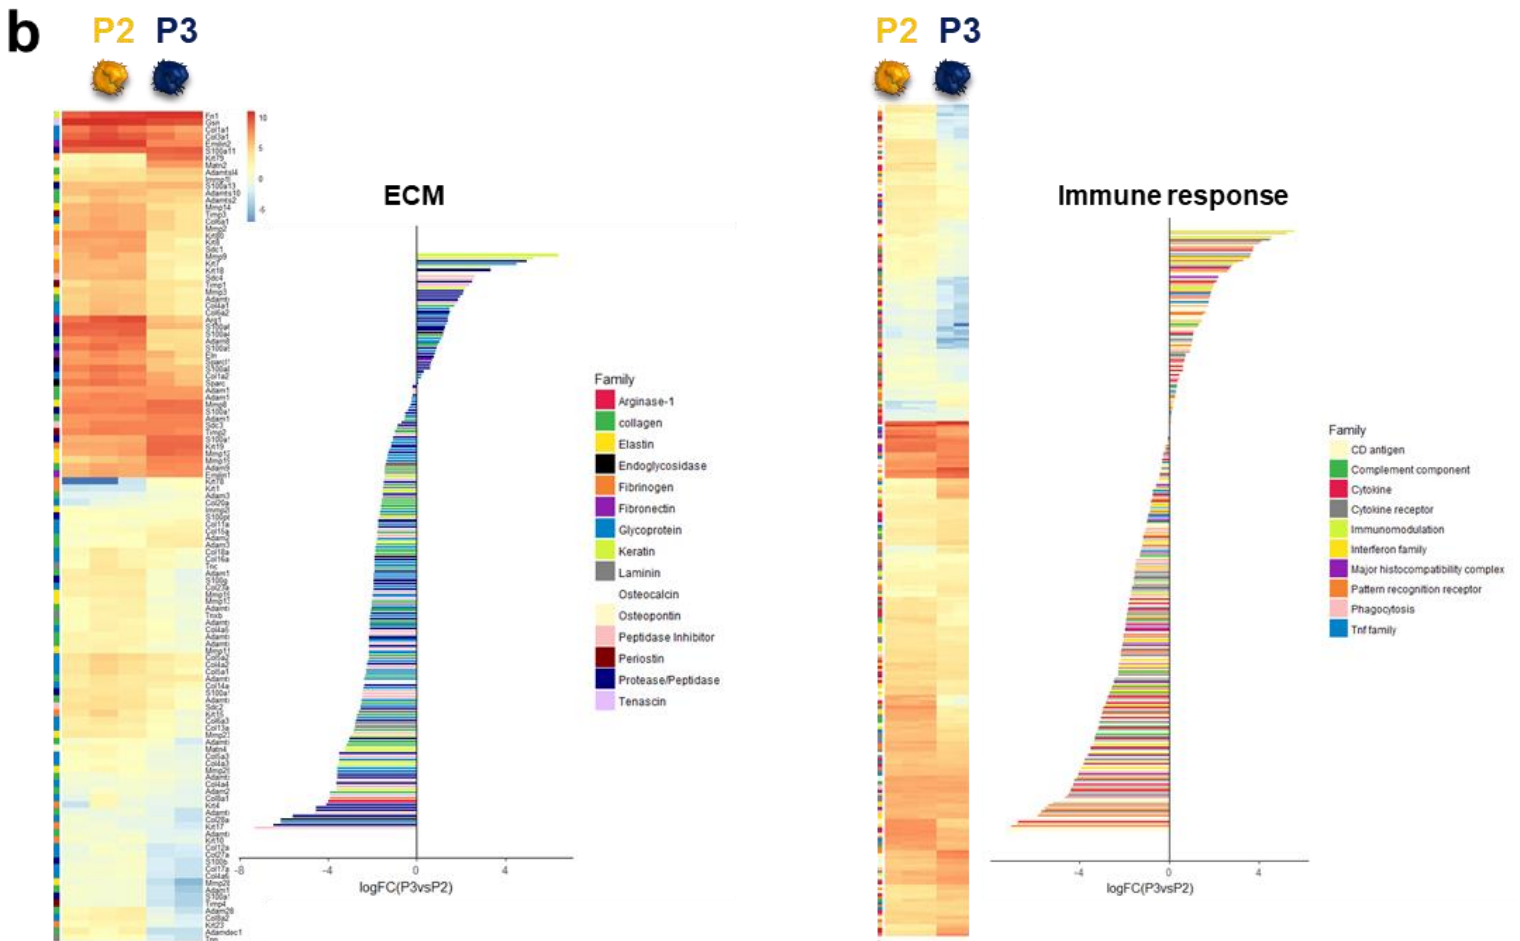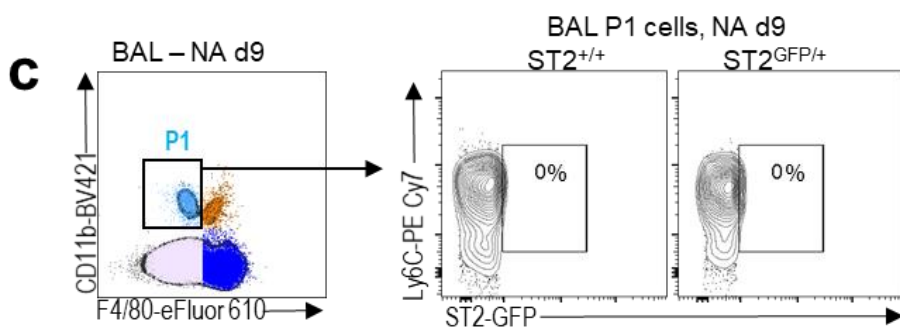

**Supplementary Figure 3. Transcriptomic analysis of lung myeloid cell subsets in the airways of NA-injured mice.**

**(a)** Summary of differentially expressed genes ( $P < 0.01$ ;  $FC > 2$ ) in each pairwise comparison showing differentially expressed genes in red and blue in a volcano plot, the total number of differentially expressed genes in the middle of the bidirectional arrows. **(b)** Heatmaps showing the relative expression of selected genes in P2 and P3 cell subsets that are associated with macrophage-mediated modulation of the epithelial cell niche. These functions include extracellular matrix (ECM) remodeling (left panel) and immune responses (right panel) between P2 and P3 cells. **(c)** FACS quantification as percentage of ST2 expression on P1 cell subsets in BAL. Using GFP ST2 reporter mice, results confirmed no expression of ST2 at the protein level on P1 cells.

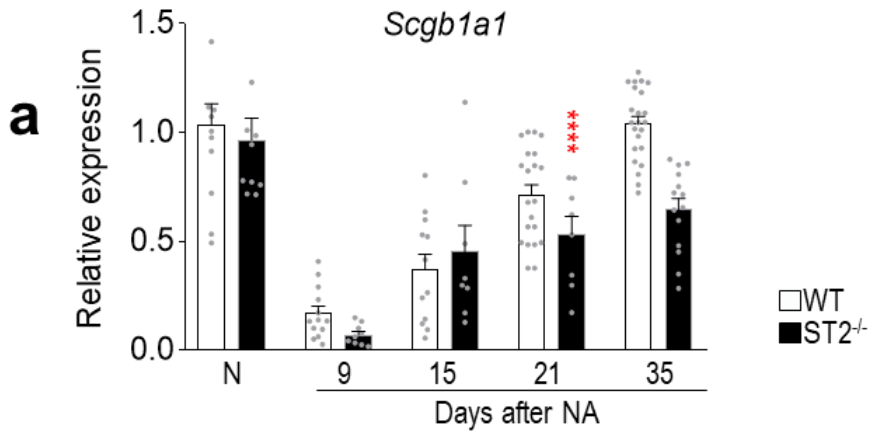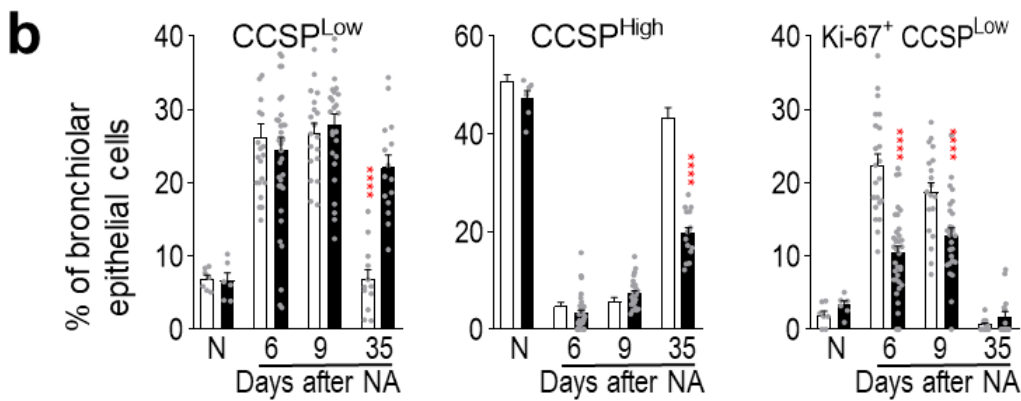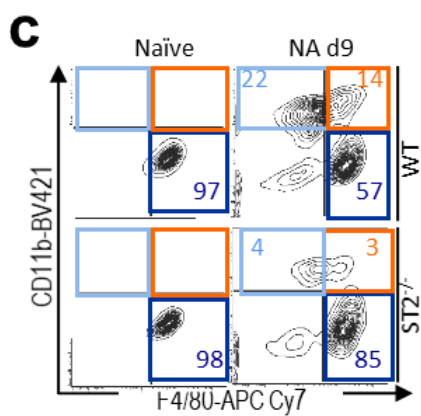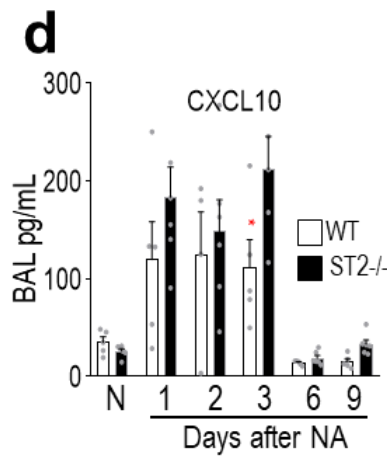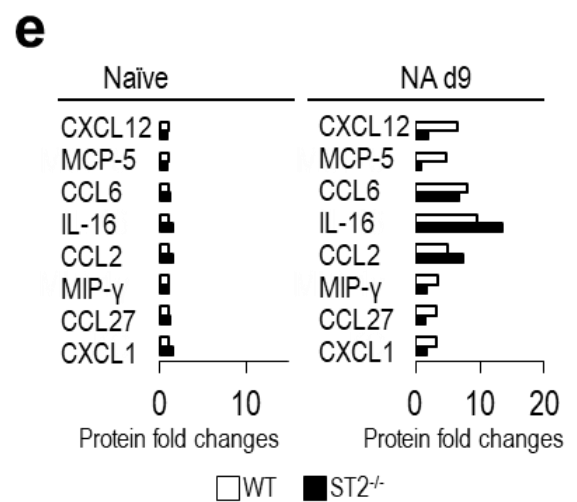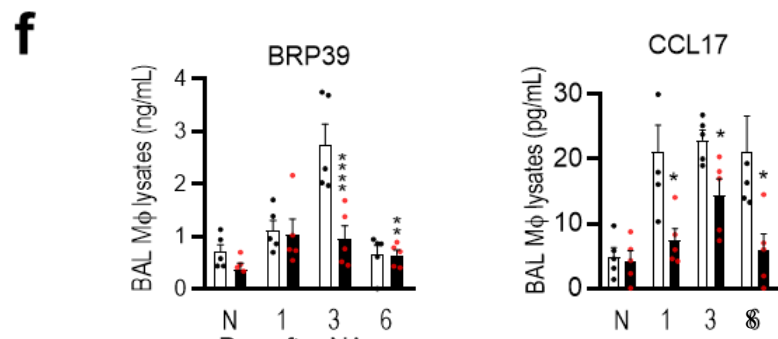



**Supplementary Figure 4. ST2 deficient mice exhibit impaired club cell proliferation associated with an alteration in myeloid cell function after club cell injury.**

**(a)** Quantification of *Scgb1a1* mRNA levels in lung homogenates of WT or ST2<sup>-/-</sup> mice from naïve (N) or treated with naphthalene (NA) and analyzed at the indicated time-points. **(b)** Proportion of club cells expressing CCSP at low and high levels within the bronchioles at indicated time-points (left panels). Right panel, quantification of club cell proliferation, as assessed within the CCSP low population by immunofluorescence staining of Ki-67 in lung tissue sections. **(c)** Representative flow cytometric plots of P1-P3 subsets in BAL cells of WT or ST2<sup>-/-</sup> mice from naïve or 9 days after treatment with naphthalene (NA d9). Data are represented as percentage. **(d)** Levels of CXCL10 in BAL supernatants. **(e)** Quantification of relative levels of the indicated mediators in BAL macrophage lysates. **(f)** Quantification of BRP-39 and CCL17 in BAL macrophage lysates. Graphs from n=8 (a,b), 6 (d) and 5 (f) mice, shown are mean ± SEM pooled from three independent experiments. \*  $P < 0.05$ , \*\* $P < 0.01$ , \*\*\* $P < 0.001$  and \*\*\*\* $P < 0.0001$  between ST2<sup>-/-</sup> and NA-treated WT mice using One-Way (a,b and f) and Two-Way ANOVA (d and e), Bonferroni post-test.

**a**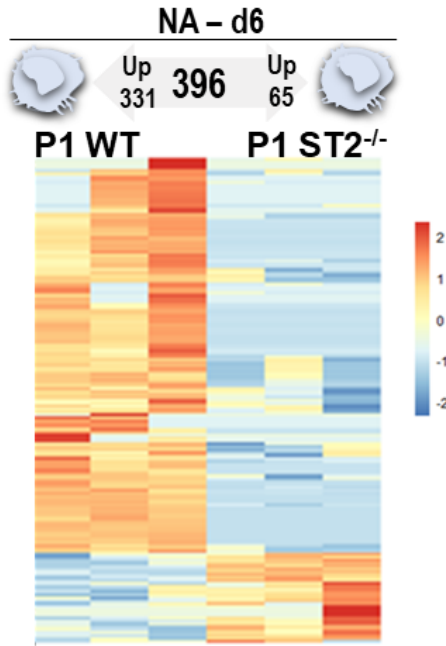**GO processes Up in P1 ST2<sup>-/-</sup> - NA d6**

MIF-induced cell adhesion, migration and angiogenesis  
 TNF-alpha signaling  
 Oxidative stress\_IL-8 signaling pathway  
 Inhibition of migration by proresolving lipid mediators

**GO processes Down in P1 ST2<sup>-/-</sup> - NA d6**

NF-kB-, AP-1- and MAPKs-mediated proinflammatory cytokine production  
 Immune response\_IL-10 signaling pathway  
 Proinflammatory cytokine release  
 Cell adhesion\_ECM remodeling  
 Immune response\_Role of HMGB1 in cell maturation and migration  
 Immune response\_CD16 signaling  
 Cell cycle\_Role of Nek in cell cycle regulation  
 Innate immune response to contact allergens  
 Survival\_Role of CDK5 in neuronal death and survival  
 Cell adhesion\_Plasmin signaling  
 Development\_Transcriptional regulation

**b**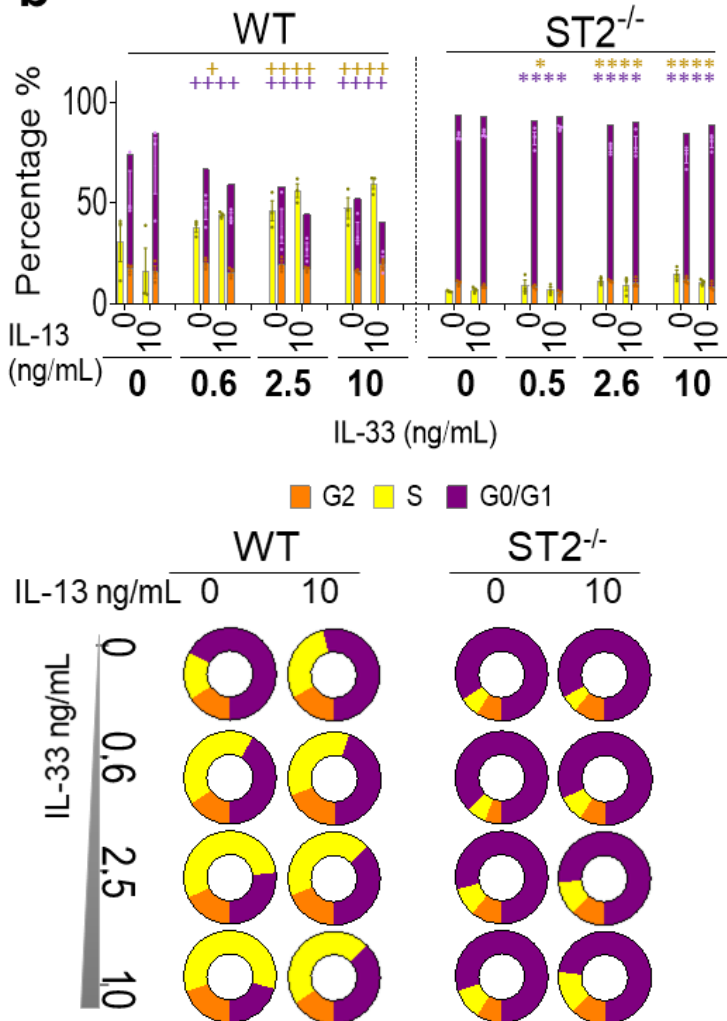

Statistics are presented in the checklist table

**c**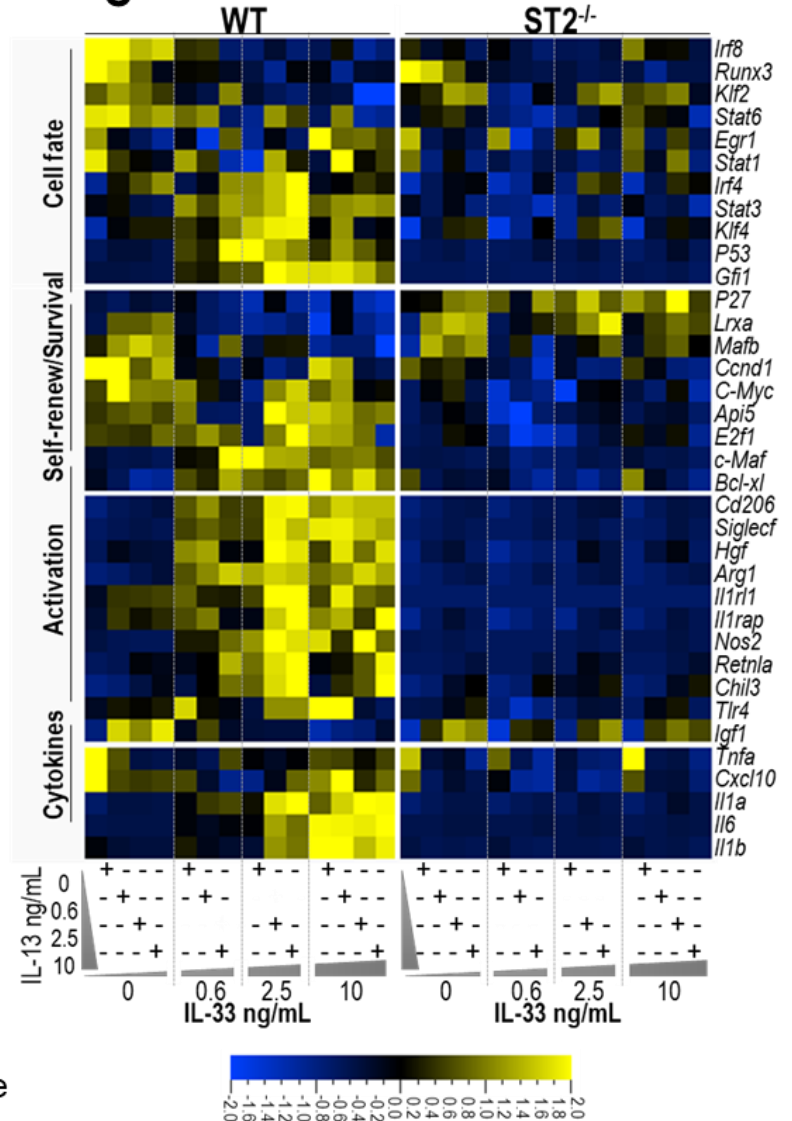

**Supplementary Figure 5. Transcriptomic profiling of P1 cells in ST2 deficient mice after NA injury; ST2 deficiency alters cell cycle and self-renewal of bone marrow-derived macrophages and also alters the phenotype of bone marrow-derived macrophages.**

**(a)** Heatmap of differentially expressed genes ( $P < 0.01$ ;  $FC > 2$ ) in P1 showing differentially expressed genes (6 days post-NA) in WT and ST2<sup>-/-</sup> on the left and right of the bidirectional arrow. The total number of differentially expressed genes (396) is presented in the middle of the bidirectional arrow. The GO pathway analysis associated with the genes differentially expressed in WT versus ST2<sup>-/-</sup> are illustrated on the right side of the heatmap. Scale bar on the right denotes relative log<sub>2</sub> differences in gene expression for each row. **(b)** BMDMs were cultured alone or M-CSF with the indicated concentrations of IL-33 and/or IL-13 for 3 days. Quantification of G0/G1, S, and G2 phases in WT and ST2<sup>-/-</sup> BMDMs as determined by gating in Fig. 7a. Graphs show mean  $\pm$  SEM from BMDMs separately cultured from three individual mice. \* $P < 0.05$ , \*\* $P < 0.01$ , \*\*\* $P < 0.001$  and \*\*\*\* $P < 0.0001$  between IL13 or/and IL-33-stimulated WT and ST2<sup>-/-</sup> BMDMs using Two-Way ANOVA (b), Bonferroni post-test. **(c)** Heat-map constructed from Fluidigm analysis of mRNA transcripts for the indicated genes from cultured WT and ST2<sup>-/-</sup> BMDMs. Scale bar to the left denotes relative log<sub>2</sub> differences in gene expression for each row. Disc graphs denote mean only. Bar graphs in b show means  $\pm$  SEM. Samples are bone marrow treated and cultured separately from three individual mice per genotype.

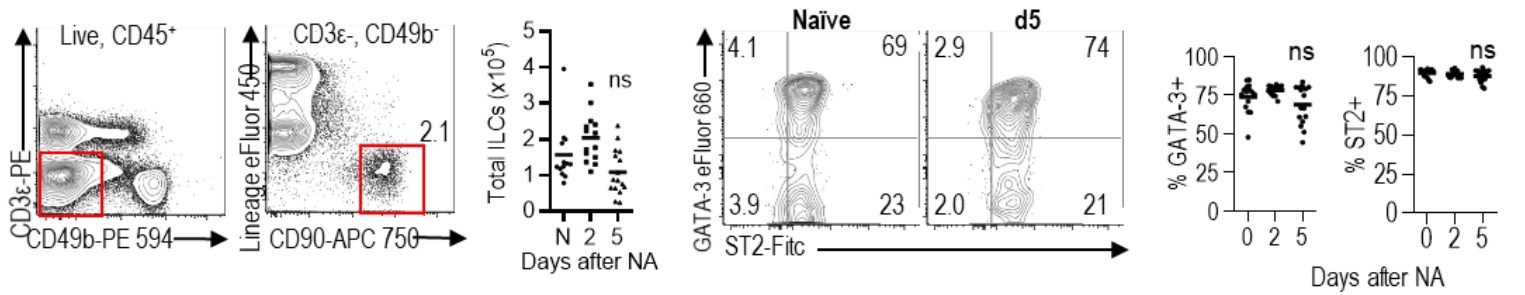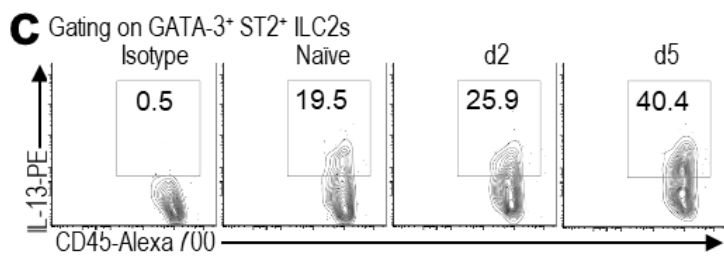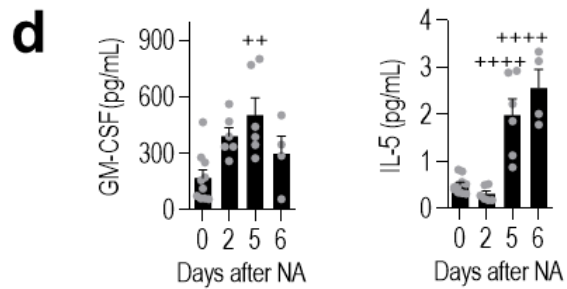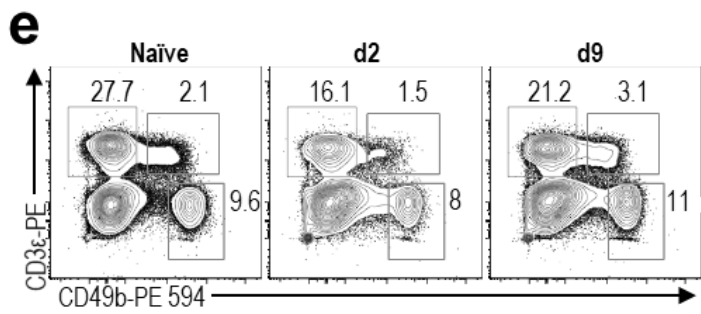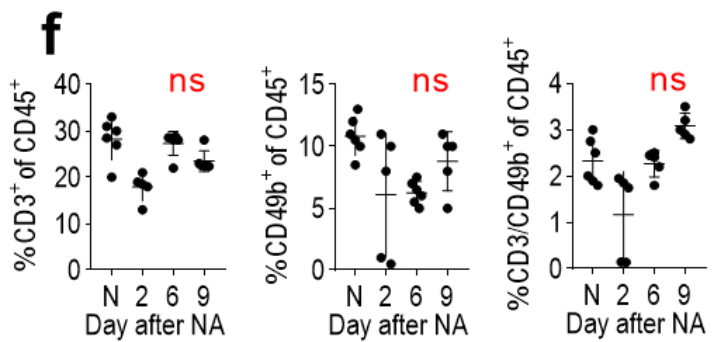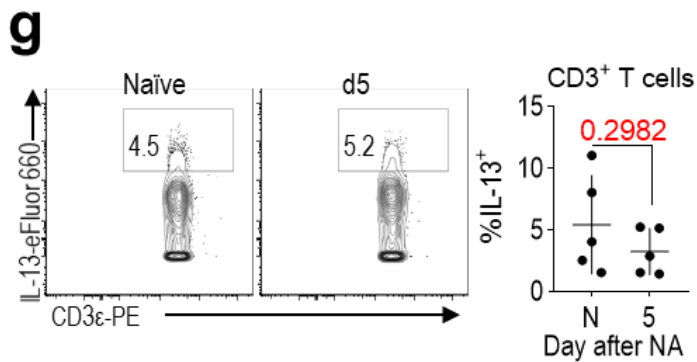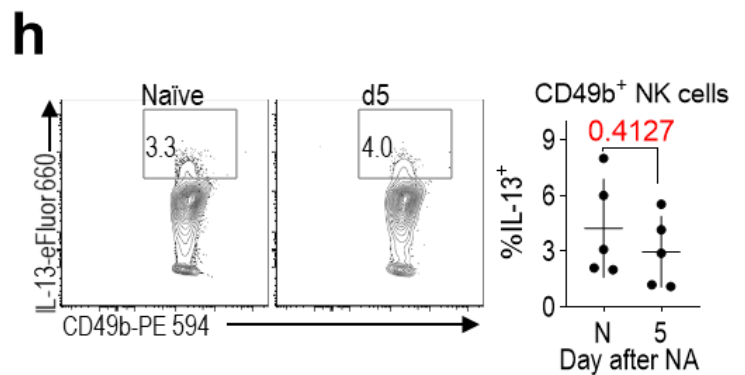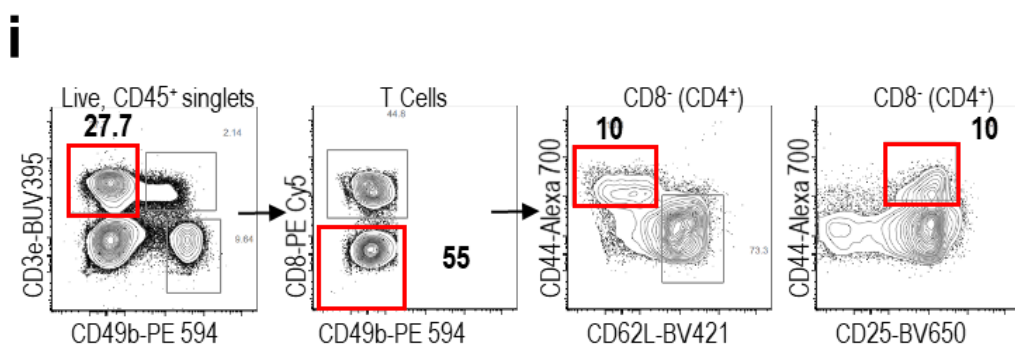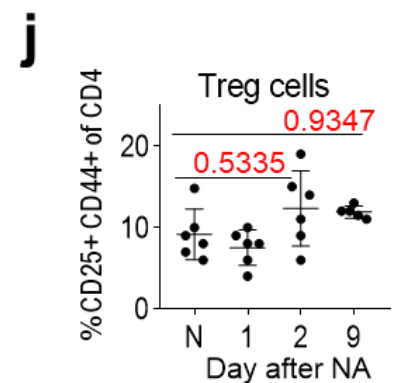

**Supplementary Figure 6. Identification of ILC2s as the main source of IL-13 in the airways of NA-treated mice.**

**(a)** Gating strategy for quantifying ILCs as live, CD45<sup>+</sup>, CD3ε<sup>-</sup>, CD49b<sup>-</sup>, lineage<sup>-</sup>, CD90<sup>+</sup> cells, used in Figure 9a left panel. Red boxes denote gating from parent populations. In the right panel, quantification of the total ILCs number in lungs at days 0, 2, and 5 post-NA treatment. **(b)** FACS analysis of ST2 and GATA-3 expression on ILCs as gated in (a). Number in corners of plots denotes percentage for each quadrant of the parent population. The frequency of GATA-3<sup>+</sup> and ST2<sup>+</sup> ILCs are quantified in the graphs on the right and Figure 9a right panel. **(c)** ILCs were isolated from the lungs of mice on days 0, 2, 5, and 6 post-NA treatment and stimulated *ex vivo*. Staining of stimulated ILCs for IL-13 production, quantified in Figure 9b. **(d)** GM-CSF and IL-5 quantification in the supernatant of stimulated ILCs as determined by ELISA. **(e-f)** T and NK cell numbers remain unchanged within the lungs of naïve (N) and NA-treated mice, analyzed at the indicated timepoints. (e) Representative plots showing T cells (upper left gate), NK cells (lower right gate), and NKT cell (upper right gate) frequencies as percentages of total viable, CD45<sup>+</sup> cells in the lungs. (f) Quantification of each gated population in e. **(g-h)** Whole lung homogenates were stimulated for 4 hours with PMA, ionomycin, and brefeldin A and the percentage of IL-13<sup>+</sup> T cells (g) and NK cells (h) was determined. **(i-j)** Treg cell numbers remain unchanged in the lungs of NA-treated mice, gated as CD25<sup>+</sup> CD44<sup>+</sup> CD4<sup>+</sup> cells. (i) Representative plots showing Treg cell frequencies as percentages of total viable, CD4<sup>+</sup> cells in the lungs. (j) Quantification of the Treg population as gated in (i). Data from n=13 (a,b), 4-6 (d), 6 (f), 5 (g-h) and 6 (j) mice, show mean ± SEM pooled from three independent experiments. \*\**P* < 0.01 and \*\*\*\**P* < 0.0001 between NA-treated and naïve WT mice using One-Way ANOVA, Bonferroni post-test (a,d and j). Kruskal-Wallis test is used in (b), and Student's T-test in (f,g and h). ns = not significant.



**Supplementary Figure 7. BMDMs from *Rag2<sup>-/-</sup>/Il2r $\gamma$ C<sup>-/-</sup>* (ILC-deficient) mice differentiate into functional AAMs upon IL-33 treatment.**

**(a)** Representative flow plots showing the frequency as percentage of lineage<sup>-</sup>, CD90<sup>+</sup> innate lymphoid cells, (ILCs), in WT C57BL/6, *Rag2<sup>-/-</sup>/Il2r $\gamma$ C<sup>-/-</sup>*, or *Rag2<sup>-/-</sup>/Il2r $\gamma$ C<sup>-/-</sup>* mice that adoptively received GFP<sup>+</sup> ILC2s, 3d post-NA and quantified on the graph in the right. **(b)** Representative histogram showing GFP expression in WT C57BL/6 or *Rag2<sup>-/-</sup>/Il2r $\gamma$ C<sup>-/-</sup>* mice that adoptively received GFP<sup>+</sup> ILC2s (*Rag2<sup>-/-</sup>/Il2r $\gamma$ C<sup>-/-</sup>* + ILC2). Graph shows individual mice, where the mean is indicated by a line. Data are from single independent experiment but are representative of two independent experiments in (a-b). **(c-d)** WT C57BL/6 or *Rag2<sup>-/-</sup>/Il2r $\gamma$ C<sup>-/-</sup>* mice that adoptively received GFP<sup>+</sup> ILC2s (*Rag2<sup>-/-</sup>/Il2r $\gamma$ C<sup>-/-</sup>* + ILC2) were treated with NA and BAL samples were collected at days 0, 2, and 6. (c) Representative flow plots showing the frequency as percentage of ST2<sup>+</sup> P2 cells in BAL and quantified in Figure 9h. Blue gates and numbers denote frequency of ST2<sup>+</sup> P3 AAMs. Orange gates and numbers denote frequency of ST2<sup>+</sup> P2 cells. (d) Quantification of CCL17 and BRP-39 in BAL supernatants. **(e-g)** Bone marrow-derived cells from *Rag2<sup>-/-</sup>/Il2r $\gamma$ C<sup>-/-</sup>*, (C57BL/6 background), mice were cultured in M-CSF alone, (unstimulated), or cultured in the presence of M-CSF with varying concentrations of IL-13 and/or IL-33 for 6 days *ex vivo*. Quantification by FACS of ST2 expression (e) and Arg-1<sup>+</sup> CD206<sup>+</sup> (f) BMDMs from *Rag2<sup>-/-</sup>/Il2r $\gamma$ C<sup>-/-</sup>* mice. Quantification of CCL17, IGF-I and HGF from the supernatants of *Rag2<sup>-/-</sup>/Il2r $\gamma$ C<sup>-/-</sup>* BMDMs, stimulated with 10ng/mL IL-13 or 10ng/mL IL-33 or both (g). Bar graphs from n=6 (d), 3 (e,f) and 4 (g) mice, show mean  $\pm$  SEM pooled from three independent experiments. \**P* < 0.05 between NA-treated *Rag2<sup>-/-</sup>/Il2r $\gamma$ C<sup>-/-</sup>* and WT, # *P* < 0.05 and ### *P* < 0.01 between ILC2 adoptively-transferred and NA-treated *Rag2<sup>-/-</sup>/Il2r $\gamma$ C<sup>-/-</sup>* mice using One-Way ANOVA, Bonferroni post-test (d). \**P* < 0.05 and \*\**P* < 0.01 between IL-13 or/and IL-33-stimulated *Rag2<sup>-/-</sup>/Il2r $\gamma$ C<sup>-/-</sup>* at indicated conditions using One-Way (d and g) or Two-Way (e) ANOVA, Bonferroni post-test.

## Supplementary Tables

Supplementary Table 1: Immunohistochemistry, Immunofluorescence and Antibodies

| Antigen                                   | Host, Isotype | Clone      | Dilution          | Catalog number | Vendor         |
|-------------------------------------------|---------------|------------|-------------------|----------------|----------------|
| F4/80                                     | Rat IgG2b     | CL:A3-1    | 1:200             | ab6640         | abcam          |
| CCSP                                      | Rabbit        | Serum      | 1:5000            | WRAB-3950      | Seven Hills    |
| CC10                                      | Goat IgG      | Polyclonal | 1:500             | Sc-9772        | Santa Cruz     |
| Ki67-APC                                  | Rat IgG2a     | SolA15     | 1:200             | 17-5698-82     | eBioscience    |
| IL-33                                     | Goat IgG      | Polyclonal | 1:200             | AF3626         | R&D systems    |
| $\beta$ -tubulin-Fitc                     | Mouse IgG1    | TUB 2.1    | 1:200             | ab11310        | abcam          |
| CD3 $\epsilon$ -biotin                    | Hamster IgG   | 145-2C11   | 25 $\mu$ g per mL | 100304         | Biolegend      |
| CD19-biotin                               | Rat IgG2a     | 1D3        | 25 $\mu$ g per mL | 553784         | BD biosciences |
| B220-biotin                               | Rat IgG2a     | RA3-6B2    | 25 $\mu$ g per mL | 103204         | Biolegend      |
| CD5-biotin                                | Rat IgG2a     | 53-7.3     | 25 $\mu$ g per mL | 100604         | Biolegend      |
| TCR $\beta$ -biotin                       | Hamster IgG   | H57-597    | 25 $\mu$ g per mL | 109204         | Biolegend      |
| TCR $\gamma\delta$ -biotin                | Hamster IgG   | GL3        | 25 $\mu$ g per mL | 118103         | Biolegend      |
| CD11c-biotin                              | Hamster IgG   | N418       | 25 $\mu$ g per mL | 117304         | Biolegend      |
| F4/80-biotin                              | Rat IgG2a     | BM8        | 25 $\mu$ g per mL | 123106         | Biolegend      |
| Gr-1-biotin                               | Rat IgG2b     | RB6-8C5    | 25 $\mu$ g per mL | 108404         | Biolegend      |
| Ter119-biotin                             | Rat IgG2b     | TER-119    | 25 $\mu$ g per mL | 116204         | Biolegend      |
| CD49b-biotin                              | Rat IgM       | DX5        | 25 $\mu$ g per mL | 108904         | Biolegend      |
| NK1.1-biotin                              | Mouse IgG2a   | PK136      | 25 $\mu$ g per mL | 108704         | Biolegend      |
| CD27-biotin                               | Hamster IgG   | LG3A10     | 25 $\mu$ g per mL | 124206         | Biolegend      |
| Secondary anti-Goat IgG-Alexa Fluor 488   | Donkey IgG    | Polyclonal | 1:500             | A32814         | ThermoFisher   |
| Secondary anti-Goat IgG-Alexa Fluor 555   | Donkey IgG    | Polyclonal | 1:500             | A32816         | ThermoFisher   |
| Secondary anti-Rabbit IgG-Alexa Fluor 488 | Donkey IgG    | Polyclonal | 1:500             | A32790         | ThermoFisher   |
| Secondary anti-Rabbit IgG-Alexa Fluor 555 | Donkey IgG    | Polyclonal | 1:500             | A32794         | ThermoFisher   |



Supplementary Table 2: FACS Antibodies

| Antibody                 | Host, Isotype | Clone      | Dilution                      | Catalog numbe | Vendor         |
|--------------------------|---------------|------------|-------------------------------|---------------|----------------|
| CD45-BUV395              | Rat IgG2b     | 30-F11     | 1:200                         | 564279        | BD Bioscience  |
| F4/80-APC Cy7            | Rat IgG2a     | BM8        | 1:50                          | 123118        | Biolegend      |
| CD11c-APC                | Hamster IgG1  | HL3        | 1:200                         | 550261        | BD Bioscience  |
| CD11b-BV421              | Rat IgG2b     | M1/70      | 1:200                         | 101251        | Biolegend      |
| CD11b-PE                 | Rat IgG2b     | M1/70      | 1:200                         | 101208        | Biolegend      |
| Ly6C-PE CY7              | Rat IgM       | AL-21      | 1:200                         | 560593        | BD Bioscience  |
| CD64-Alexa Fluor 594     | Rat IgG2a     | 290322     | 5µL per 10 <sup>6</sup> cells | FAB20741P     | R&D systems    |
| Ki67-APC                 | Rat IgG2a     | SolA15     | 1:200                         | 17-5698-82    | eBioscience    |
| Arg-1-PE                 | Sheep IgG     | Polyclonal | 5µL per 10 <sup>6</sup> cells | IC5868P       | R&D systems    |
| Biotinylated CD206       | Goat IgG      | Polyclonal | 5µg per mL                    | BAF2535       | R&D systems    |
| CD206-BV650              | Rat IgG2a     | C068C2     | 1:200                         | 141723        | Biolegend      |
| Biotinylated YM1         | Goat IgG      | Polyclonal | 1:200                         | BAF2446       | R&D systems    |
| Biotinylated FIZZ-1      | Goat IgG      | Polyclonal | 1:200                         | BAF1523       | R&D systems    |
| Siglec-F-BV711           | Rat IgG2a     | E50-2440   | 1:200                         | 740764        | BD Bioscience  |
| ST2-Fitc                 | Rat IgG1      | DJ8        | 1:200                         | 101001F       | MD Biosciences |
| Streptavidin-BV421       | -             | -          | 1:1000                        | 405226        | Biolegend      |
| CD3ε-PE                  | Hamster IgG1  | 145-2C11   | 1:100                         | 553063        | BD bioscience  |
| CD3ε- BUV395             | Hamster IgG1  | 145-2C11   | 1:100                         | 563565        | BD bioscience  |
| CD49b-PE/Dazzle 594      | Rat IgM       | DX5        | 1:200                         | 108924        | Biolegend      |
| CD45-Alexa Fluor 700     | Rat IgG2b     | 30-F11     | 1:400                         | 103128        | Biolegend      |
| CD45-BV510               | Rat IgG2b     | 30-F11     | 1:300                         | 103137        | Biolegend      |
| CD25-BV650               | Rat IgG1      | PC61       | 1:400                         | 102037        | Biolegend      |
| CD90.2-APC eFluor 780    | Rat IgG2a     | 53-2.1     | 1:400                         | 47-0902       | eBioscience    |
| CD44-Alexa 700           | Rat IgG2b     | IM7        | 1:400                         | 103026        | Biolegend      |
| CD4-BV750                | Rat IgG2b     | GK1.5      | 1:200                         | 100467        | Biolegend      |
| CD8-PE Cy5               | Rat IgG2a     | 56-6.7     | 1:200                         | 100710        | Biolegend      |
| CD62L-BV421              | Rat IgG2a     | MEL-14     | 1:200                         | 104435        | Biolegend      |
| IL-18Rα-PerCP eFluor 710 | Rat IgG2a     | P3TUNYA    | 1:100                         | 46-5183       | eBioscience    |
| CD90-eFluor 450/BV421    | Mouse IgG2a   | 53-2.1     | 1:200                         | 48-0900-82    | eBioscience    |
| CD45-eFluor 450/BV421    | Rat IgG2b     | 30-F11     | 1:200                         | 48-0451-82    | eBioscience    |
| CD3ε-eFluor 450/BV421    | Hamster IgG1  | 145-2C11   | 1:200                         | 562600        | BD Bioscience  |
| TCRβ-eFluor 450/BV421    | Hamster IgG1  | H57-597    | 1:200                         | 48-5961-82    | eBioscience    |
| TCRγδ-eFluor450/BV421    | Hamster IgG1  | GL3        | 1:200                         | 118120        | Biolegend      |
| CD5-eFluor 450/BV421     | Rat IgG2a     | 53-7.3     | 1:200                         | 100617        | Biolegend      |
| F4/80-eFluor 450/BV421   | Rat IgG2a     | BM8        | 1:200                         | 123131        | Biolegend      |

|                        |             |           |       |            |               |
|------------------------|-------------|-----------|-------|------------|---------------|
| CD11c-eFluor 450/BV421 | Hamster IgG | N418      | 1:200 | 117329     | Biolegend     |
| Gr-1-eFluor 450/BV421  | Rat IgG2b   | RB6-8C5   | 1:200 | 108433     | Biolegend     |
| CD19-eFluor 450/BV421  | Rat IgG2a   | 1D3       | 1:200 | 562701     | BD Bioscience |
| FCεRI-eFluor450/BV421  | Hamster IgG | MAR-1     | 1:200 | 48-5898-82 | eBioscience   |
| B220-eFluor 450/BV421  | Rat IgG2a   | RA3-6B2   | 1:200 | 103239     | Biolegend     |
| NK1.1-eFluor 450/BV421 | Mouse IgG2a | PK136     | 1:200 | 108731     | Biolegend     |
| CD27-eFluor 450/BV421  | Hamster IgG | LG3A10    | 1:200 | 561245     | BD Bioscience |
| FoxP3-Alexa Fluor 647  | Rat IgG2b   | MF23      | 1:200 | 560401     | BD Bioscience |
| GATA-3-eFluor 660      | Rat IgG2b   | TWAJ      | 1:400 | 50-9966-42 | eBioscience   |
| IL-13-PE               | Rat IgG1    | clone 13A | 1:200 | 12-7133-41 | eBioscience   |
| IL-13- eFluor 660      | Rat IgG1    | clone 13A | 1:200 | 50-7133-82 | eBioscience   |

Supplementary Table 3: Taqman primers

|                                |                                   |
|--------------------------------|-----------------------------------|
| <i>Retnla</i> (Mm00445109_m1)  | <i>Chil3</i> (Mm00657889_mH)      |
| <i>Il1rl1</i> (Mm00516117-m1)  | <i>Itgax</i> (Mm00498698_m1)      |
| <i>Scgb1a1</i> (Mm00442046_m1) | <i>Mrc1/Cd206</i> (Mm00485148_m1) |
| <i>Arg1</i> (Mm00475988_m1)    | <i>Gapdh</i> (4352932E)           |
| <i>Api5</i> (m00516117-m1)     | <i>Il1rap</i> (Mm00492638_m1)     |
| <i>Arg1</i> (Mm00475988_m1)    | <i>Il1rl1</i> (Mm00516117_m1)     |
| <i>Bcl-xl</i> (Mm00498698_m1)  | <i>Irf4</i> (Mm00516431_m1)       |
| <i>Ccnd1</i> (Mm00657889_mH)   | <i>Klf2</i> (Mm00500486_m1)       |
| <i>Cd206</i> (Mm00485148_m1)   | <i>Klf4</i> (Mm00516104_m1)       |
| <i>c-Mafb</i> (Mm00485148_m1)  | <i>Lrxα</i> (Mm00443451_m1)       |
| <i>c-Myc</i> (Mm00442046_m1)   | <i>Nos2</i> (Mm00440502_m1)       |
| <i>Cxcl10</i> (m00445235_m1)   | <i>P27</i> (Mm00438168_m1)        |
| <i>E2f1</i> (Mm00475988_m1)    | <i>P53</i> (Mm01731290_g1)        |
| <i>Egr1</i> (Mm00475988_m1)    | <i>Retnla</i> (Mm00445109_m1)     |
| <i>Gfi1</i> (Mm00515853_m1)    | <i>Runx3</i> (Mm00490666_m1)      |
| <i>Hgf</i> (Mm01135184_m1)     | <i>Siglecf</i> (Mm00556586_m1)    |
| <i>Ifr8</i> (Mm00492567_m1)    | <i>Stat1</i> (Mm00439531_m1)      |
| <i>Igf1</i> (Mm00439560_m1)    | <i>Stat3</i> (Mm01219775_m1)      |
| <i>Il1a</i> (Mm00439620_m1)    | <i>Stat6</i> (Mm01160477_m1)      |
| <i>Il1b</i> (Mm00434228_m1)    | <i>Tlr4</i> (Mm00445274_m1)       |
| <i>Il6</i> (Mm00446190_m1)     | <i>Tnfa</i> (Mm00443258_m1)       |
| <i>Gapdh</i> (Mm99999915_g1)   |                                   |

Supplementary Table 4: Summary of tables for RNA seq data from WT mice

|                                                                                                                                     |
|-------------------------------------------------------------------------------------------------------------------------------------|
| Supplementary data 1: Group comparison result for WT, P2 vs P1                                                                      |
| Supplementary data 2: Group comparison result for WT, P3 vs P1                                                                      |
| Supplementary data 3: Group comparison result for WT, P3 vs P2                                                                      |
| Supplementary data 4: Group comparison result for WT, P3 d6 vs d0                                                                   |
| Supplementary data 5: Representative differentially expressed genes between P1, P2 and P3 in each cluster as heatmap of Figure 3b   |
| Supplementary data 6: Summary for Geneset enrichment analysis (Figure 3b, 3d)                                                       |
| Supplementary data 7: Group comparison result (P2 vs P3) for the complete list for Growth Factors, ECM and inflammation (Figure 3c) |

Supplementary Table 5: Summary of tables for RNA seq data from ST2KO versus WT mice

|                                                                                                                                              |
|----------------------------------------------------------------------------------------------------------------------------------------------|
| Supplementary data 8: Group comparison result for P1, ST2KO vs WT                                                                            |
| Supplementary data 9: Group comparison result for P2, ST2KO vs WT                                                                            |
| Supplementary data 10: Group comparison result for P3, ST2KO vs WT                                                                           |
| Supplementary data 11: Summary for pathway enrichment analysis P2, ST2KO vs WT (Figure 6b)                                                   |
| Supplementary data 12: Summary for pathway enrichment analysis P3, ST2KO vs WT (Figure 6c)                                                   |
| Supplementary data 13: Group comparison result for the complete list for Growth Factors, ECM and immune response, P2 ST2KO vs WT (Figure 6d) |
| Supplementary data 14: Group comparison result for the complete list for Growth Factors, ECM and immune response, P3 ST2KO vs WT (Figure 6d) |

Supplementary Table 6: Statistical analyses methods

| FIGURE # | TEST USED                           |                     | <i>n</i>                         |                                              |                     | DESCRIPTIVE STATS<br>(AVERAGE, VARIANCE) |                     | P VALUE                                                                                                                                                                                                           |                     |
|----------|-------------------------------------|---------------------|----------------------------------|----------------------------------------------|---------------------|------------------------------------------|---------------------|-------------------------------------------------------------------------------------------------------------------------------------------------------------------------------------------------------------------|---------------------|
|          | WHICH TEST                          | SECTION & PARAGRAPH | EXACT VALUE                      | DEFINED                                      | SECTION & PARAGRAPH | REPORTED                                 | SECTION & PARAGRAPH | EXACT VALUE                                                                                                                                                                                                       | SECTION & PARAGRAPH |
| Fig 1b   | One-Way ANOVA, Bonferroni post-test | Methods             | 8 per group                      | Lung sections from individual mice C57BL6    | Figure Legend       | Error bars represent Mean ± SEM          | Figure Legend       | d2-d15; <0.0001<br>d21; 0.0312                                                                                                                                                                                    | Methods             |
| Fig 1d   | One-Way ANOVA, Bonferroni post-test | Methods             | 9 per group                      | BAL cells from individual mice C57BL6        | Figure Legend       | Error bars represent Mean ± SEM          | Figure Legend       | d2, 0.0322;<br>d3, 0.0008;<br>d6, <0.0001;<br>d9, <0.0001;<br>d15, <0.0001;<br>d21, 0.0065                                                                                                                        | Methods             |
| Fig 1e   | One-Way ANOVA, Bonferroni post-test | Methods             | For all cytokines<br>8 per group | BAL supernatants from individual mice C57BL6 | Figure Legend       | Error bars represent Mean ± SEM          | Figure Legend       | IL-13 d2, 0.0006;<br>IL-13 d3, 0.0064;<br>IL-13 d6, 0.0298;<br>CCL2 d2, <0.0001;<br>CCL2 d3, 0.0001;<br>CXCL10 d1, 0.0431;<br>CXCL10 d2, <0.0001;<br>CXCL10 d3, 0.0019;<br>IL-1α d1, <0.0001;<br>IL-1α d2, 0.0276 | Methods             |
| Fig 1g   | One-Way ANOVA, Bonferroni post-test | Methods             | 6 per group                      | BAL cells from individual mice C57BL6        | Figure Legend       | Error bars represent Mean ± SEM          | Figure Legend       | P1 d6, 0.0031;<br>P1 d9, <0.0001;<br>P1 d15, 0.0036;<br>P2 d6, 0.0166;<br>P2 d9, <0.0001;<br>P2 d15, <0.0001;<br>P2 d21, 0.0014;<br>P3 d6, <0.0001;<br>P3 d9, <0.0001;<br>P3 d15, <0.0001;<br>P3 d21, 0.0027      | Methods             |
| Fig 1i   | One-Way ANOVA, Bonferroni post-test | Methods             | 6 per group                      | BAL cells from individual mice C57BL6        | Figure Legend       | Error bars represent Mean ± SEM          | Figure Legend       | Ki-67 (P2+P3) d3, 0.0163;<br>Ki-67 (P2+P3) d6, <0.0001;<br>Ki-67 (P2+P3) d9, <0.0001;<br>Ki-67 (P2+P3) d15, <0.0001;<br>Ki-67 (P2+P3) d21, 0.0003                                                                 | Methods             |
| Fig 2b   | One-Way ANOVA, Bonferroni post-test | Methods             | 8 per group                      | Lung mRNAs from individual mice C57BL6       | Figure Legend       | Error bars represent Mean ± SEM          | Figure Legend       | Depleted d21, 0.0026;<br>Depleted d35, <0.0001;<br>Transferred d21, 0.0229;<br>Transferred d35, <0.0001                                                                                                           | Methods             |

|        |                                     |         |                                              |                                                                    |               |                                     |               |                                                                                                                                                      |         |
|--------|-------------------------------------|---------|----------------------------------------------|--------------------------------------------------------------------|---------------|-------------------------------------|---------------|------------------------------------------------------------------------------------------------------------------------------------------------------|---------|
| Fig 2c | One-Way ANOVA, Bonferroni post-test | Methods | 3 per group                                  | Lung sections from individual mice C57BL6                          | Figure Legend | Error bars represent Mean $\pm$ SEM | Figure Legend | Depleted d21, 0.0016;<br>Depleted d35, <0.0001;<br>Transferred d21, 0.0021;<br>Transferred d35, <0.0001                                              | Methods |
| Fig 2d | One-Way ANOVA, Bonferroni post-test | Methods | 6 per group                                  | BAL cells from individual mice C57BL6                              | Figure Legend | Error bars represent Mean $\pm$ SEM | Figure Legend | P2 d6, 0.0428;<br>P2 d9, <0.0001;<br>P2 d15, <0.0001;<br>P2 d21, 0.0134;<br>P3 d6, <0.0001;<br>P3 d9, <0.0001;<br>P3 d15, <0.0001;<br>P3 d21, 0.0011 | Methods |
| Fig 4a | One-Way ANOVA, Bonferroni post-test | Methods | 7 per group                                  | BAL cells mRNAs from individual mice C57BL6                        | Figure Legend | Error bars represent Mean $\pm$ SEM | Figure Legend | d6, 0.0487;<br>d9, 0.0001                                                                                                                            | Methods |
| Fig 4e | One-Way ANOVA, Bonferroni post-test | Methods | 8 per group                                  | BAL supernatants from individual mice C57BL6                       | Figure Legend | Error bars represent Mean $\pm$ SEM | Figure Legend | sST2, d1, 0.0283;<br>sST2, d2, <0.0001;<br>sST2, d3, 0.0019                                                                                          | Methods |
| Fig 4f | One-Way ANOVA, Bonferroni post-test | Methods | 9 per group                                  | Whole lung homogenates from individual mice C57BL6                 | Figure Legend | Error bars represent Mean $\pm$ SEM | Figure Legend | IL-33, d2, 0.0028;<br>IL-33, d3, <0.0001;<br>IL-33, d6, <0.0001;<br>IL-33, d9, <0.0001;<br>IL-33, d15, <0.0001;<br>IL-33, d21, 0.0385                | Methods |
| Fig 5b | One-Way ANOVA, Bonferroni post-test | Methods | 10 per group                                 | Lung sections from individual ST2 <sup>-/-</sup> vs C57BL6 mice    | Figure Legend | Error bars represent Mean $\pm$ SEM | Figure Legend | d21, 0.0439;<br>d35, <0.0001                                                                                                                         | Methods |
| Fig 5c | Two-Way ANOVA, Bonferroni post-test | Methods | 5 per group                                  | BAL cells from individual ST2 <sup>-/-</sup> vs C57BL6 mice        | Figure Legend | Error bars represent Mean $\pm$ SEM | Figure Legend | P1 d6, <0.0001;<br>P1 d9, <0.0001;<br><br>P2 d9, <0.0001;<br><br>P3 d2, 0.0003;<br>P3 d6, <0.0001;<br>P3 d9, <0.0001;<br>P3 d21, <0.0001             | Methods |
| Fig 5d | Two-Way ANOVA, Bonferroni post-test | Methods | N (8)<br>d1 (8)<br>d2 (8)<br>d3(6)<br>d6 (8) | BAL supernatants from individual ST2 <sup>-/-</sup> vs C57BL6 mice | Figure Legend | Error bars represent Mean $\pm$ SEM | Figure Legend | IL-13 d1, 0.0078;<br>IL-13 d2, <0.0001;<br>IL-13 d3, 0.0920                                                                                          | Methods |
| Fig 5d | Two-Way ANOVA, Bonferroni post-test | Methods | 5 per group                                  | BAL supernatants from individual ST2 <sup>-/-</sup> vs C57BL6 mice | Figure Legend | Error bars represent Mean $\pm$ SEM | Figure Legend | CCL2 d1, >0.9999;<br>CCL2 d2, >0.9999;<br>CCL2 d3, 0.0423                                                                                            | Methods |

|        |                                     |         |                               |                                                                                                      |               |                                 |               |                                                                                                                                                                                                                                                                                                                                                                                                                                                                                                                                                                                                                                                                       |         |
|--------|-------------------------------------|---------|-------------------------------|------------------------------------------------------------------------------------------------------|---------------|---------------------------------|---------------|-----------------------------------------------------------------------------------------------------------------------------------------------------------------------------------------------------------------------------------------------------------------------------------------------------------------------------------------------------------------------------------------------------------------------------------------------------------------------------------------------------------------------------------------------------------------------------------------------------------------------------------------------------------------------|---------|
| Fig 5e | One-Way ANOVA, Bonferroni post-test | Methods | For all cytokines 5 per group | BAL cell lysates from individual ST2 <sup>-/-</sup> vs C57BL6 mice                                   | Figure Legend | Error bars represent Mean ± SEM | Figure Legend | IGF-1 d3, 0.0235; IGF-1 d6, 0.0492; HGF d3, 0.0019; HGF d6, 0.0036                                                                                                                                                                                                                                                                                                                                                                                                                                                                                                                                                                                                    | Methods |
| Fig 5f | One-Way ANOVA, Bonferroni post-test | Methods | 5 per group                   | BAL cells from individual ST2 <sup>-/-</sup> vs C57BL6 mice                                          | Figure Legend | Error bars represent Mean ± SEM | Figure Legend | Ki67 d9, <0.0001                                                                                                                                                                                                                                                                                                                                                                                                                                                                                                                                                                                                                                                      | Methods |
| Fig 5h | One-Way ANOVA, Bonferroni post-test | Methods | 10 per group                  | Lung sections from individual ST2 <sup>-/-</sup> , AAM transferred ST2 <sup>-/-</sup> vs C57BL6 mice | Figure Legend | Error bars represent Mean ± SEM | Figure Legend | ST2 <sup>-/-</sup> vs WT d35, 0.0031; AAM transferred ST2 <sup>-/-</sup> vs ST2 <sup>-/-</sup> d35, 0.0031                                                                                                                                                                                                                                                                                                                                                                                                                                                                                                                                                            | Methods |
| Fig 5i | One-Way ANOVA, Bonferroni post-test | Methods | 8 per group                   | Lung mRNAs from individual ST2 <sup>-/-</sup> vs WT C57BL6 mice                                      | Figure Legend | Error bars represent Mean ± SEM | Figure Legend | d35, ST2 <sup>-/-</sup> vs WT, 0.0029; d35, AAM transferred into ST2 <sup>-/-</sup> vs WT, 0.0031                                                                                                                                                                                                                                                                                                                                                                                                                                                                                                                                                                     | Methods |
| Fig 7b | Two-Way ANOVA, Bonferroni post-test | Methods | 3 per group                   | BMDMs from individual ST2 <sup>-/-</sup> vs WT C57BL6 mice                                           | Figure Legend | Error bars represent Mean ± SEM | Figure Legend | G0/G1, WT, IL33 (0.6) vs unstimulated, 0.0133; G0/G1, WT, IL33 (2.5) vs unstimulated, <0.0001; G0/G1, WT, IL33 (10) vs unstimulated, <0.0001; G0/G1, IL33 (0.6), ST2 <sup>-/-</sup> vs WT, <0.0001; G0/G1, IL33 (2.5), ST2 <sup>-/-</sup> vs WT, <0.0001; G0/G1, IL33 (10), ST2 <sup>-/-</sup> vs WT, <0.0001; S, WT, IL33 (0.6) vs unstimulated, 0.0015; S, WT, IL33 (2.5) vs unstimulated, <0.0001; S, WT, IL33 (10) vs unstimulated, <0.0001; S, IL33 (0.6), ST2 <sup>-/-</sup> vs WT, <0.0001; S, IL33 (2.5), ST2 <sup>-/-</sup> vs WT, <0.0001; S, IL33 (10), ST2 <sup>-/-</sup> vs WT, <0.0001;                                                                 | Methods |
| Fig 8b | Two-Way ANOVA, Bonferroni post-test | Methods | 4 per group                   | BMDM cells from individual GFP ST2 mice                                                              | Figure Legend | Error bars represent Mean ± SEM | Figure Legend | GFP ST2, IL-13, 0.0270; GFP ST2, IL-33, 0.0019; GFP ST2, IL-13 (10) IL33 (10), <0.0001 GFP ST2, IL-13 (10) IL33 (10 vs IL-33, 0.0198                                                                                                                                                                                                                                                                                                                                                                                                                                                                                                                                  | Methods |
| Fig 8d | Two-Way ANOVA, Bonferroni post-test | Methods | 3 per group                   | BMDM cells from individual ST2 <sup>-/-</sup> vs WT C57BL6 mice                                      | Figure Legend | Error bars represent Mean ± SEM | Figure Legend | CD206 Arg1, IL-13 (10), 0.0025; CD206 Arg1, IL-33 (10), 0.0017; CD206 Arg1, IL-13 (10) IL33 (10), <0.0001                                                                                                                                                                                                                                                                                                                                                                                                                                                                                                                                                             | Methods |
| Fig 8e | Two-Way ANOVA, Bonferroni post-test | Methods | 3 per group                   | BMDM supernatants from individual ST2 <sup>-/-</sup> vs WT C57BL6 mice                               | Figure Legend | Error bars represent Mean ± SEM | Figure Legend | HGF, WT, IL33 (2.5) vs unstimulated, 0.0350; HGF, WT, IL33 (2.5) IL13 (10) vs unstimulated, 0.0450; HGF, WT, IL33 (10) vs unstimulated, <0.0001; HGF, WT, IL33 (10) IL13 (10) vs unstimulated, <0.0001; HGF, IL33 (0), ST2 <sup>-/-</sup> vs WT, 0.0055; HGF, IL33 (0.6), ST2 <sup>-/-</sup> vs WT, 0.0007; HGF, IL33 (2.5), ST2 <sup>-/-</sup> vs WT, <0.0001; HGF, IL33 (10), ST2 <sup>-/-</sup> vs WT, <0.0001; HGF, IL33 (0) IL13 (10), ST2 <sup>-/-</sup> vs WT, 0.0053 ; HGF, IL33 (0.6) IL13 (10), ST2 <sup>-/-</sup> vs WT, 0.0035; HGF, IL33 (2.5) IL13 (10), ST2 <sup>-/-</sup> vs WT, 0.0004; HGF, IL33 (10) IL13 (10), ST2 <sup>-/-</sup> vs WT, <0.0001; | Methods |



|        |                                     |         |                                                        |                                                                                                                                                                          |                         |                                 |               |                                                                                                                                                                                                                                                                                                                                                                                                                                                                                                                                      |         |
|--------|-------------------------------------|---------|--------------------------------------------------------|--------------------------------------------------------------------------------------------------------------------------------------------------------------------------|-------------------------|---------------------------------|---------------|--------------------------------------------------------------------------------------------------------------------------------------------------------------------------------------------------------------------------------------------------------------------------------------------------------------------------------------------------------------------------------------------------------------------------------------------------------------------------------------------------------------------------------------|---------|
| Fig 8f | Two-Way ANOVA, Bonferroni post-test | Methods | 3 per group                                            | BMDM supernatants from individual <i>ST2<sup>-/-</sup></i> vs WT C57BL6 mice                                                                                             | Figure Legend           | Error bars represent Mean ± SEM | Figure Legend | IGF-1, WT, IL33 (10) vs unstimulated, 0.0196; IGF-1, WT, IL33 (0) IL13 (10) vs unstimulated, <0.0001; IGF-1, WT, IL33 (0.6) IL13 (10) vs unstimulated, <0.0001; IGF-1, WT, IL33 (2.5) IL13 (10) vs unstimulated, 0.0071; IGF-1, WT, IL33 (10) IL13 (10) vs unstimulated, 0.0129; IGF-1, IL33 (0.6), <i>ST2<sup>-/-</sup></i> vs WT, 0.0327; IGF-1, IL33 (2.5), <i>ST2<sup>-/-</sup></i> vs WT, 0.0059; IGF-1, IL33 (10), <i>ST2<sup>-/-</sup></i> vs WT, 0.0496; IGF-1, IL33 (0.6) IL13 (10), <i>ST2<sup>-/-</sup></i> vs WT, 0.0019 |         |
| Fig 8g | Two-Way ANOVA, Bonferroni post-test | Methods | 3 per group                                            | BMDM supernatants from individual <i>ST2<sup>-/-</sup></i> vs WT C57BL6 mice                                                                                             | Figure Legend           | Error bars represent Mean ± SEM | Figure Legend | BRP39, WT, IL33 (2.5) vs unstimulated, <0.0001; BRP39, WT, IL33 (2.5) IL13 (10) vs unstimulated, 0.0002; BRP39, WT, IL33 (10) vs unstimulated, <0.0001; BRP39, WT, IL33 (2.5) IL13 (10) vs unstimulated, <0.0001; BRP39, IL33 (2.5), <i>ST2<sup>-/-</sup></i> vs WT, <0.0001; BRP39, IL33 (10), <i>ST2<sup>-/-</sup></i> vs WT, <0.0001; BRP39, IL33 (2.5) IL13 (10), <i>ST2<sup>-/-</sup></i> vs WT, <0.0001; BRP39, IL33 (10) IL13 (10), <i>ST2<sup>-/-</sup></i> vs WT, <0.0001;                                                  | Methods |
| Fig 9a | One-Way ANOVA, Bonferroni post-test | Methods | (N) 15<br>(2) 15<br>(5) 16                             | ILCS from the lungs of Individual mice                                                                                                                                   | Figure legends, methods | Individual mice with mean       | Figure Legend | Total ILCs Frequency, 0.0003                                                                                                                                                                                                                                                                                                                                                                                                                                                                                                         | Methods |
| Fig 9a | One-Way ANOVA, Bonferroni post-test | Methods | (N)15<br>(2)15<br>(5)16                                | ILCS from the lungs of Individual mice                                                                                                                                   | Figure legends, methods | Individual mice with mean       | Figure legend | % <i>ST2<sup>+</sup></i> GATA-3+, 0.1326;<br><br><i>ST2<sup>+</sup></i> , 0.3734                                                                                                                                                                                                                                                                                                                                                                                                                                                     | Methods |
| Fig 9b | One-Way ANOVA, Bonferroni post-test | Methods | (N) 7<br>(2) 6<br>(5) 6                                | Pooled ILCs from WT B6 mice stimulated with IL-2 and IL-33                                                                                                               | Figure Legend, Methods  | Error bars represent Mean ± SEM | Figure legend | % IL-13+, <0.0001                                                                                                                                                                                                                                                                                                                                                                                                                                                                                                                    | Methods |
| Fig 9c | One-Way ANOVA, Bonferroni post-test | Methods | For all cytokines<br>(N) 10<br>(2) 6<br>(5) 6<br>(6) 4 | Pooled ILCs from WT B6 mice stimulated with IL-2 and IL-33                                                                                                               | Figure Legend, Methods  | Error bars represent Mean ± SEM | Figure legend | IL-13 d5, <0.0001<br>IL-13 d6, <0.0001                                                                                                                                                                                                                                                                                                                                                                                                                                                                                               | Methods |
| Fig 9c | One-Way ANOVA, Bonferroni post-test | Methods | For all cytokines<br>(N) 10<br>(2) 6<br>(5) 6<br>(6) 4 | Pooled ILCs from WT B6 mice stimulated with IL-2 and IL-33                                                                                                               | Figure Legend, Methods  | Error bars represent Mean ± SEM | Figure legend | Amphiregulin N vs. 2, > 0.9999;<br>Amphiregulin N vs. 5, > 0.9999;<br>Amphiregulin N vs. d6, > 0.9999;<br>Amphiregulin d2 vs. d5, > 0.9999;<br>Amphiregulin d2 vs. d6, > 0.9999;<br>Amphiregulin d5 vs. d6, > 0.9999;                                                                                                                                                                                                                                                                                                                | Methods |
| Fig 9e | Two-Way ANOVA, Bonferroni post-test | Methods | 4 per group                                            | Lung mRNA from individual <i>Rag2<sup>-/-</sup></i> <i>Il2ryc<sup>-/-</sup></i> , ILC2 transferred <i>Rag2<sup>-/-</sup></i> <i>Il2ryc<sup>-/-</sup></i> and C57BL6 mice | Figure Legend           | Error bars represent Mean ± SEM | Figure Legend | <i>Scgb1a1</i> d35 <i>Rag2<sup>-/-</sup></i> <i>Il2ryc<sup>-/-</sup></i> vs d35 WT, 0.005;<br><br><i>Scgb1a1</i> d35 <i>Rag2<sup>-/-</sup></i> <i>Il2ryc<sup>-/-</sup></i> vs d35 <i>Rag2<sup>-/-</sup></i> <i>Il2ryc<sup>-/-</sup></i> +ILC2, 0.0018                                                                                                                                                                                                                                                                                | Methods |

|         |                                     |         |             |                                                                                                                                                                                                           |               |                                     |               |                                                                                                                                                                                                                                                                                                                                                                                                                                                                                                                                                                                                                                                                                                                                                                                                                                                                                                  |               |
|---------|-------------------------------------|---------|-------------|-----------------------------------------------------------------------------------------------------------------------------------------------------------------------------------------------------------|---------------|-------------------------------------|---------------|--------------------------------------------------------------------------------------------------------------------------------------------------------------------------------------------------------------------------------------------------------------------------------------------------------------------------------------------------------------------------------------------------------------------------------------------------------------------------------------------------------------------------------------------------------------------------------------------------------------------------------------------------------------------------------------------------------------------------------------------------------------------------------------------------------------------------------------------------------------------------------------------------|---------------|
| Fig 9g  | One-Way ANOVA, Bonferroni post-test | Methods | 5 per group | BAL cells from individual <i>Rag2<sup>-/-</sup> Il2r<math>\gamma</math><sup>c/-</sup></i> , ILC2 transferred <i>Rag2<sup>-/-</sup> Il2r<math>\gamma</math><sup>c/-</sup></i> and C57BL6 mice              | Figure Legend | Error bars represent Mean $\pm$ SEM | Figure Legend | P1 <i>Rag2<sup>-/-</sup> Il2r<math>\gamma</math><sup>c/-</sup></i> vs WT d6, 0.0359;<br>P1 ILC2 transferred <i>Rag2<sup>-/-</sup> Il2r<math>\gamma</math><sup>c/-</sup></i> vs <i>Rag2<sup>-/-</sup> Il2r<math>\gamma</math><sup>c/-</sup></i> vs d6, <0.0001;<br>P2 <i>Rag2<sup>-/-</sup> Il2r<math>\gamma</math><sup>c/-</sup></i> vs WT d6, <0.0001;<br>P2 ILC2 transferred <i>Rag2<sup>-/-</sup> Il2r<math>\gamma</math><sup>c/-</sup></i> vs <i>Rag2<sup>-/-</sup> Il2r<math>\gamma</math><sup>c/-</sup></i> vs d6, 0.0189;<br>P3 <i>Rag2<sup>-/-</sup> Il2r<math>\gamma</math><sup>c/-</sup></i> vs WT d6, 0.0344;<br>P3 ILC2 transferred <i>Rag2<sup>-/-</sup> Il2r<math>\gamma</math><sup>c/-</sup></i> vs <i>Rag2<sup>-/-</sup> Il2r<math>\gamma</math><sup>c/-</sup></i> vs d6, 0.0484                                                                                                 | Methods       |
| Fig 9h  | One-Way ANOVA, Bonferroni post-test | Methods | 5 per group | BAL cells from individual <i>Rag2<sup>-/-</sup> Il2r<math>\gamma</math><sup>c/-</sup></i> , ILC2 transferred <i>Rag2<sup>-/-</sup> Il2r<math>\gamma</math><sup>c/-</sup></i> and C57BL6 mice              | Figure Legend | Error bars represent Mean $\pm$ SEM | Figure Legend | ST2+ P2 <i>Rag2<sup>-/-</sup> Il2r<math>\gamma</math><sup>c/-</sup></i> vs WT d6, <0.0001;<br><br>ST2+ P2 ILC2 transferred <i>Rag2<sup>-/-</sup> Il2r<math>\gamma</math><sup>c/-</sup></i> vs <i>Rag2<sup>-/-</sup> Il2r<math>\gamma</math><sup>c/-</sup></i> vs d6, 0.0004;                                                                                                                                                                                                                                                                                                                                                                                                                                                                                                                                                                                                                     | Methods       |
| Fig 9i  | One-Way ANOVA, Bonferroni post-test | Methods | 6 per group | Whole lung homogenates from individual <i>Rag2<sup>-/-</sup> Il2r<math>\gamma</math><sup>c/-</sup></i> , ILC2 transferred <i>Rag2<sup>-/-</sup> Il2r<math>\gamma</math><sup>c/-</sup></i> and C57BL6 mice | Figure Legend | Error bars represent Mean $\pm$ SEM | Figure Legend | Lung IL-13 <i>Rag2<sup>-/-</sup> Il2r<math>\gamma</math><sup>c/-</sup></i> vs WT d6, 0.0463;<br><br>Lung IL-13 ILC2 transferred <i>Rag2<sup>-/-</sup> Il2r<math>\gamma</math><sup>c/-</sup></i> vs <i>Rag2<sup>-/-</sup> Il2r<math>\gamma</math><sup>c/-</sup></i> vs d6, <0.0001;                                                                                                                                                                                                                                                                                                                                                                                                                                                                                                                                                                                                               | Methods       |
| Fig 9j  | One-Way ANOVA, Bonferroni post-test | Methods | 6 per group | BAL supernatants from individual <i>Rag2<sup>-/-</sup> Il2r<math>\gamma</math><sup>c/-</sup></i> , ILC2 transferred <i>Rag2<sup>-/-</sup> Il2r<math>\gamma</math><sup>c/-</sup></i> and C57BL6 mice       | Figure Legend | Error bars represent Mean $\pm$ SEM | Figure Legend | BAL IL-13 <i>Rag2<sup>-/-</sup> Il2r<math>\gamma</math><sup>c/-</sup></i> vs WT d2, <0.0001;<br><br>BAL IL-13 <i>Rag2<sup>-/-</sup> Il2r<math>\gamma</math><sup>c/-</sup></i> vs WT d6, 0.0120;<br><br>BAL IL-13 ILC2 transferred <i>Rag2<sup>-/-</sup> Il2r<math>\gamma</math><sup>c/-</sup></i> vs <i>Rag2<sup>-/-</sup> Il2r<math>\gamma</math><sup>c/-</sup></i> vs d6, <0.0001                                                                                                                                                                                                                                                                                                                                                                                                                                                                                                              | Methods       |
| Fig 9k  | One-Way ANOVA, Bonferroni post-test | Methods | 8 per group | BAL supernatants from individual <i>Rag2<sup>-/-</sup> Il2r<math>\gamma</math><sup>c/-</sup></i> , ILC2 transferred <i>Rag2<sup>-/-</sup> Il2r<math>\gamma</math><sup>c/-</sup></i> and C57BL6 mice       | Figure Legend | Error bars represent Mean $\pm$ SEM | Figure Legend | IGF-1 <i>Rag2<sup>-/-</sup> Il2r<math>\gamma</math><sup>c/-</sup></i> vs WT d2, <0.0001;<br>IGF-1 ILC2 transferred <i>Rag2<sup>-/-</sup> Il2r<math>\gamma</math><sup>c/-</sup></i> vs <i>Rag2<sup>-/-</sup> Il2r<math>\gamma</math><sup>c/-</sup></i> vs d2, 0.0389;<br>IGF-1 ILC2 transferred <i>Rag2<sup>-/-</sup> Il2r<math>\gamma</math><sup>c/-</sup></i> vs <i>Rag2<sup>-/-</sup> Il2r<math>\gamma</math><sup>c/-</sup></i> vs d6, 0.0002;<br><br>HGF <i>Rag2<sup>-/-</sup> Il2r<math>\gamma</math><sup>c/-</sup></i> vs WT d2, 0.0223;<br>HGF ILC2 transferred <i>Rag2<sup>-/-</sup> Il2r<math>\gamma</math><sup>c/-</sup></i> vs <i>Rag2<sup>-/-</sup> Il2r<math>\gamma</math><sup>c/-</sup></i> vs d2, 0.0288;<br>HGF ILC2 transferred <i>Rag2<sup>-/-</sup> Il2r<math>\gamma</math><sup>c/-</sup></i> vs <i>Rag2<sup>-/-</sup> Il2r<math>\gamma</math><sup>c/-</sup></i> vs d6, 0.0053 | Methods       |
| Fig S1a | One-Way ANOVA, Bonferroni post-test | Methods | 8 per group | Lung mRNAs from individual mice C57BL6                                                                                                                                                                    | Figure Legend | Error bars represent Mean $\pm$ SEM | Figure Legend | d2-d15, <0.0001;<br>d21, 0.0445                                                                                                                                                                                                                                                                                                                                                                                                                                                                                                                                                                                                                                                                                                                                                                                                                                                                  | Figure Legend |
| Fig S1e | One-Way ANOVA, Bonferroni post-test | Methods | 5 per group | BAL cells from individual depleted vs WT C57BL6 mice                                                                                                                                                      | Figure Legend | Error bars represent Mean $\pm$ SEM | Figure Legend | P1, CD11b, d6, depleted vs WT, 0.0005;<br>P1, CD11b, d9, depleted vs WT, <0.0001;<br>P1, CD11b, d15, depleted vs WT, 0.0015;<br>P1, YM1, d6, depleted vs WT, 0.0220;<br>P1, YM1, d9, depleted vs WT, <0.0001;<br>P2, CD11b, d9, depleted vs WT, 0.0258;<br>P2, CD11b, d9, depleted vs WT, <0.0001;<br>P2, CD11b, d15, depleted vs WT, <0.0001;                                                                                                                                                                                                                                                                                                                                                                                                                                                                                                                                                   | Methods       |

|         |                                     |         |             |                                                           |               |                                 |               |                                                                                                                                                                                                                                                                                                                                                                                                                                                                                                                                                                                                                                                                                                                                                                                                                                                                                                                                                                                                                                                                                                                              |         |
|---------|-------------------------------------|---------|-------------|-----------------------------------------------------------|---------------|---------------------------------|---------------|------------------------------------------------------------------------------------------------------------------------------------------------------------------------------------------------------------------------------------------------------------------------------------------------------------------------------------------------------------------------------------------------------------------------------------------------------------------------------------------------------------------------------------------------------------------------------------------------------------------------------------------------------------------------------------------------------------------------------------------------------------------------------------------------------------------------------------------------------------------------------------------------------------------------------------------------------------------------------------------------------------------------------------------------------------------------------------------------------------------------------|---------|
|         |                                     |         |             |                                                           |               |                                 |               | <p>P2, CD11b, d21, depleted vs WT, 0.0001;<br/> P2, CD11c, d9, depleted vs WT, &lt;0.0001;<br/> P2, CD11c, d15, depleted vs WT, &lt;0.0001;<br/> P2, CD11c, d21, depleted vs WT, 0.0016;<br/> P2, Arg-1, d6, depleted vs WT, 0.0469;<br/> P2, Arg-1, d9, depleted vs WT, &lt;0.0001;<br/> P2, Arg-1, d15, depleted vs WT, &lt;0.0001;<br/> P2, Arg-1, d21, depleted vs WT, 0.0002;<br/> P3, CD206, d6, depleted vs WT, &lt;0.0001;<br/> P3, CD206, d9, depleted vs WT, &lt;0.0001;<br/> P3, CD206, d15, depleted vs WT, &lt;0.0001;<br/> P3, CD206, d21, depleted vs WT, &lt;0.0001;<br/> P3, YM1, d6, depleted vs WT, &lt;0.0001;<br/> P3, YM1, d9, depleted vs WT, &lt;0.0001;<br/> P3, YM1, d15, depleted vs WT, &lt;0.0001;<br/> P3, YM1, d21, depleted vs WT, 0.0186;<br/> P3, Arg-1, d6, depleted vs WT, &lt;0.0001;<br/> P3, Arg-1, d9, depleted vs WT, &lt;0.0001;<br/> P3, Arg-1, d15, depleted vs WT, 0.0003;<br/> P3, FIZZ-1, d6, depleted vs WT, &lt;0.0001;<br/> P3, FIZZ-1, d9, depleted vs WT, &lt;0.0001;<br/> P3, FIZZ-1, d15, depleted vs WT, &lt;0.0001;<br/> P3, FIZZ-1, d21, depleted vs WT, 0.0417</p> |         |
| Fig S1f | One-Way ANOVA, Bonferroni post-test | Methods | 8 per group | BAL cell mRNAs from individual WT C57BL6 mice             | Figure Legend | Error bars represent Mean ± SEM | Figure Legend | <p><i>Itgax</i>, d6, 0.0010;<br/> <i>Itgax</i>, d9, 0.0006;<br/> <i>Cd206</i>, d6, 0.0145;<br/> <i>Cd206</i>, d9, 0.0009;<br/> <i>Retnla</i>, d9, 0.0003;<br/> <i>Retnla</i>, d15, 0.0079;<br/> <i>Arg1</i>, d3, &lt;0.0001;<br/> <i>Arg1</i>, d6, &lt;0.0001;<br/> <i>Arg1</i>, d9, 0.0074;<br/> <i>Chil3</i>, d3, 0.0431;<br/> <i>Chil3</i>, d6, 0.0015;</p>                                                                                                                                                                                                                                                                                                                                                                                                                                                                                                                                                                                                                                                                                                                                                               | Methods |
| Fig S2a | Two-Way ANOVA, Bonferroni post-test | Methods | 4 per group | BAL cell from individual depleted vs WT C57BL6 mice       | Figure Legend | Error bars represent Mean ± SEM | Figure Legend | <p>d3, depleted vs WT, 0.0355;<br/> d6, depleted vs WT, &lt;0.0001;<br/> d9, depleted vs WT, &lt;0.0001;<br/> d15, depleted vs WT, &lt;0.0001;<br/> d21, depleted vs WT, 0.0008</p>                                                                                                                                                                                                                                                                                                                                                                                                                                                                                                                                                                                                                                                                                                                                                                                                                                                                                                                                          | Methods |
| Fig S2b | Two-Way ANOVA, Bonferroni post-test | Methods | 8 per group | BAL cell mRNAs from individual depleted vs WT C57BL6 mice | Figure Legend | Error bars represent Mean ± SEM | Figure Legend | <p><i>Cd206</i>, d6, depleted vs WT, 0.0098;<br/> <i>Cd206</i>, d9, depleted vs WT, 0.0009;<br/> <i>Retnla</i>, d9, depleted vs WT, 0.0013;<br/> <i>Retnla</i>, d15, depleted vs WT, 0.0027;<br/> <i>Arg1</i>, d3, depleted vs WT, &lt;0.0108;<br/> <i>Arg1</i>, d6, depleted vs WT, 0.0008;<br/> <i>Arg1</i>, d9, depleted vs WT, 0.0041;<br/> <i>Chil3</i>, d3, depleted vs WT, 0.0019;<br/> <i>Chil3</i>, d6, depleted vs WT, 0.0361;<br/> <i>Chil3</i>, d9, depleted vs WT, 0.0440</p>                                                                                                                                                                                                                                                                                                                                                                                                                                                                                                                                                                                                                                   | Methods |

|         |                                     |         |                               |                                                             |               |                                     |               |                                                                                                                                                                                                                                                                                                                                                                                                                                                                                                                                                                                                  |         |
|---------|-------------------------------------|---------|-------------------------------|-------------------------------------------------------------|---------------|-------------------------------------|---------------|--------------------------------------------------------------------------------------------------------------------------------------------------------------------------------------------------------------------------------------------------------------------------------------------------------------------------------------------------------------------------------------------------------------------------------------------------------------------------------------------------------------------------------------------------------------------------------------------------|---------|
| Fig S4a | One-Way ANOVA, Bonferroni post-test | Methods | 8 per group                   | Lung mRNAs from individual $ST2^{-/-}$ vs WT C57BL6 mice    | Figure Legend | Error bars represent Mean $\pm$ SEM | Figure Legend | d35, $ST2^{-/-}$ vs WT, <0.0001                                                                                                                                                                                                                                                                                                                                                                                                                                                                                                                                                                  | Methods |
| Fig S4b | One-Way ANOVA, Bonferroni post-test | Methods | 8 per group                   | Lung sections from individual $ST2^{-/-}$ vs C57BL6 mice    | Figure Legend | Error bars represent Mean $\pm$ SEM | Figure Legend | CCSP <sup>low</sup> d35, <0.0001;<br>CCSP <sup>high</sup> d35, <0.0001                                                                                                                                                                                                                                                                                                                                                                                                                                                                                                                           | Methods |
| Fig S4b | One-Way ANOVA, Bonferroni post-test | Methods | 8 per group                   | Lung sections from individual $ST2^{-/-}$ vs C57BL6 mice    | Figure Legend | Error bars represent Mean $\pm$ SEM | Figure Legend | CCSP <sup>low</sup> Ki-67 <sup>+</sup> d6, 0.0002;<br>CCSP <sup>low</sup> Ki-67 <sup>+</sup> d9, 0.0001                                                                                                                                                                                                                                                                                                                                                                                                                                                                                          | Methods |
| Fig S4d | Two-Way ANOVA, Bonferroni post-test | Methods | 6 per group                   | BAL supernatants from individual $ST2^{-/-}$ vs C57BL6 mice | Figure Legend | Error bars represent Mean $\pm$ SEM |               | CXCL10, d3 compared to d3, 0.0345                                                                                                                                                                                                                                                                                                                                                                                                                                                                                                                                                                | Methods |
| Fig S4e | Two-Way ANOVA, Bonferroni post-test | Methods | 5 per group                   | Pooled BAL cell lysates from $ST2^{-/-}$ vs WT C57BL6 mice  | Figure Legend | Error bars represent Mean           | Figure Legend | CXCL12, d9 compared to d0, <0.0001;<br>MCP-5, d9 compared to d0, 0.0097;<br>CCL2, d9 compared to d0, 0.0500;<br>CCL2, d9 compared to d0, 0.0062;<br>CCL6, d2 compared to d0, 0.0097;<br>CCL6, d9 compared to d0, <0.0001<br>IL-16, d2 compared to d0, <0.0001;<br>IL-16, d9 compared to d0, <0.0001;<br><br>d9, CXCL12, $ST2^{-/-}$ vs WT, <0.0001;<br>d9, MCP-5, $ST2^{-/-}$ vs WT, 0.0017;<br>d2, IL-16, $ST2^{-/-}$ vs WT, 0.0492;<br>d9, IL-16, $ST2^{-/-}$ vs WT, 0.0017;<br>d9, CCL2, $ST2^{-/-}$ vs WT, 0.0100;                                                                           | Methods |
| Fig S4f | One-Way ANOVA, Bonferroni post-test | Methods | For all cytokines 5 per group | BAL cell lysates from individual $ST2^{-/-}$ vs C57BL6 mice | Figure Legend | Error bars represent Mean $\pm$ SEM | Figure Legend | BRP39 d3, <0.0001;<br>BRP39 d6, 0.0392;<br>CCL17 d1, 0.0399;<br>CCL17 d3, 0.0261;<br>CCL17 d6, 0.0002;                                                                                                                                                                                                                                                                                                                                                                                                                                                                                           | Methods |
| Fig S5b | Two-Way ANOVA, Bonferroni post-test | Methods | 3 per group                   | BMDM cells from individual $ST2^{-/-}$ vs WT C57BL6 mice    | Figure Legend | Error bars represent Mean $\pm$ SEM | Figure Legend | G0/G1, WT, IL33 (0.6) vs unstimulated, 0.0133;<br>G0/G1, WT, IL33 (2.5) vs unstimulated, <0.0001;<br>G0/G1, WT, IL33 (10) vs unstimulated, <0.0001;<br>G0/G1, IL33 (0.6), $ST2^{-/-}$ vs WT, <0.0001;<br>G0/G1, IL33 (2.5), $ST2^{-/-}$ vs WT, <0.0001;<br>G0/G1, IL33 (10), $ST2^{-/-}$ vs WT, <0.0001;<br><br>S, WT, IL33 (0.6) vs unstimulated, 0.0015;<br>S, WT, IL33 (2.5) vs unstimulated, <0.0001;<br>S, WT, IL33 (10) vs unstimulated, <0.0001;<br>S, IL33 (0.6), $ST2^{-/-}$ vs WT, <0.0001;<br>S, IL33 (2.5), $ST2^{-/-}$ vs WT, <0.0001;<br>S, IL33 (10), $ST2^{-/-}$ vs WT, <0.0001; | Methods |

|         |                                     |         |                                                        |                                                                                                                                                                   |               |                                     |               |                                                                                                                                                                                                                                                                                                                                                                                                                                                                                                                                                                                                                                                          |         |
|---------|-------------------------------------|---------|--------------------------------------------------------|-------------------------------------------------------------------------------------------------------------------------------------------------------------------|---------------|-------------------------------------|---------------|----------------------------------------------------------------------------------------------------------------------------------------------------------------------------------------------------------------------------------------------------------------------------------------------------------------------------------------------------------------------------------------------------------------------------------------------------------------------------------------------------------------------------------------------------------------------------------------------------------------------------------------------------------|---------|
| Fig S6a | One-Way ANOVA, Bonferroni post-test | Methods | (N) 15<br>(2) 15<br>(5) 16                             | ILCs from the lungs of Individual mice                                                                                                                            | Methods       | Individual mice with mean           | Figure Legend | Total ILCs Frequency, 0.0003;<br>Total ILCs num, 0.4595                                                                                                                                                                                                                                                                                                                                                                                                                                                                                                                                                                                                  | Methods |
| Fig S6b | Kruskal-Wallis test                 | Methods | (N) 14<br>(2) 15<br>(5) 16                             | Pooled ILCs from WT B6 mice stimulated with IL-2 and IL-33                                                                                                        | Methods       | Error bars represent Mean $\pm$ SEM | Figure legend | %GATA3+, 0.1326;<br>%ST2+, 0.3734                                                                                                                                                                                                                                                                                                                                                                                                                                                                                                                                                                                                                        | Methods |
| Fig S6d | One-Way ANOVA, Bonferroni post-test | Methods | For all cytokines<br>(N) 10<br>(2) 6<br>(5) 6<br>(6) 4 | Pooled ILCs from WT B6 mice stimulated with IL-2 and IL-33                                                                                                        | Methods       | Error bars represent Mean $\pm$ SEM | Figure legend | GM-CSF d2, 0.0828;<br>GM-CSF d5, 0.0035;<br>IL-5 d5, <0.0001;<br>IL-5 d6, <0.0001                                                                                                                                                                                                                                                                                                                                                                                                                                                                                                                                                                        | Methods |
| Fig S6g | Student's T-test                    | Methods | (N) 5<br>(5) 5                                         | T cells from the lungs of individual mice stimulated with PMA and ionomycin                                                                                       | Methods       | Individual mice with mean           | Figure legend | IL-13 d5 vs. N, 0.2982                                                                                                                                                                                                                                                                                                                                                                                                                                                                                                                                                                                                                                   | Methods |
| Fig S6h | Student's T-test                    | Methods | (N) 5<br>(5) 5                                         | NK cells from the lungs of individual mice stimulated with PMA and ionomycin                                                                                      | Methods       | Individual mice with mean           | Figure legend | IL-13 d5 vs. N, 0.4127                                                                                                                                                                                                                                                                                                                                                                                                                                                                                                                                                                                                                                   | Methods |
| Fig S6j | One-Way ANOVA, Bonferroni post-test | Methods | (N) 6<br>(1) 6<br>(2) 6<br>(9) 5                       | Treg cells from the lungs of individual mice                                                                                                                      | Methods       | Individual mice with mean           | Figure legend | Treg frequency N vs. d1, >0.9999;<br>Treg frequency N vs. d2, 0.5481;<br>Treg frequency N vs. d9, 0.9347                                                                                                                                                                                                                                                                                                                                                                                                                                                                                                                                                 | Methods |
| Fig S7d | One-Way ANOVA, Bonferroni post-test | Methods | 6 per group                                            | BAL supernatants from individual <i>Rag2<sup>-/-</sup> Il2ryc<sup>-/-</sup></i> , ILC2 transferred <i>Rag2<sup>-/-</sup> Il2ryc<sup>-/-</sup></i> and C57BL6 mice | Figure Legend | Error bars represent Mean $\pm$ SEM | Figure Legend | CCL17 <i>Rag2<sup>-/-</sup> Il2ryc<sup>-/-</sup></i> vs WT d2, 0.0001;<br>CCL17 ILC2 transferred <i>Rag2<sup>-/-</sup> Il2ryc<sup>-/-</sup></i> vs <i>Rag2<sup>-/-</sup> Il2ryc<sup>-/-</sup></i> vs d2, 0.0289;<br>CCL17 <i>Rag2<sup>-/-</sup> Il2ryc<sup>-/-</sup></i> vs WT d6, 0.0329;<br>CCL17 ILC2 transferred <i>Rag2<sup>-/-</sup> Il2ryc<sup>-/-</sup></i> vs <i>Rag2<sup>-/-</sup> Il2ryc<sup>-/-</sup></i> vs d6, 0.0468;<br>BRP39 <i>Rag2<sup>-/-</sup> Il2ryc<sup>-/-</sup></i> vs WT d6, 0.0232;<br>BRP39 ILC2 transferred <i>Rag2<sup>-/-</sup> Il2ryc<sup>-/-</sup></i> vs <i>Rag2<sup>-/-</sup> Il2ryc<sup>-/-</sup></i> vs d6, 0.0234; | Methods |
| Fig S7e | Two-Way ANOVA, Bonferroni post-test | Methods | 3 per group                                            | BMDM cells from individual <i>Rag2<sup>-/-</sup> Il2ryc<sup>-/-</sup></i> vs WT C57BL6 mice                                                                       | Figure Legend | Error bars represent Mean $\pm$ SEM | Figure Legend | IL13 (0) + IL33 (0) vs. IL13 (0) + IL33 (2.5), 0.0034;<br>IL13 (0) + IL33 (0) vs. IL13 (0) + IL33 (10), 0.0360;<br>IL13 (2.5) + IL33 (0) vs. IL13 (2.5) + IL33 (10), 0.0448;<br>IL13 (10) + IL33 (0) vs. IL13 (10) + IL33 (10), 0.0208                                                                                                                                                                                                                                                                                                                                                                                                                   |         |
| Fig S7g | One-Way ANOVA, Bonferroni post-test | Methods | 4 per group                                            | BMDM cells from individual <i>Rag2<sup>-/-</sup> Il2ryc<sup>-/-</sup></i> vs WT C57BL6 mice                                                                       | Figure Legend | Error bars represent Mean $\pm$ SEM | Figure Legend | CCL17 IL-13(0) + IL-33(0) vs. IL-13(10) + IL-33(10), 0.0016;<br>IGF-1 IL-13(0) + IL-33(0) vs. IL-13(10) + IL-33(10), 0.0249;<br>HGF IL-13(0) + IL-33(0) vs. IL-13(10) + IL-33(10), 0.0053;                                                                                                                                                                                                                                                                                                                                                                                                                                                               | Methods |
