# Supplementary material for: IL-33-ST2 axis regulates myeloid cell differentiation and activation enabling effective club cell regeneration
Source: PubMed Central journal article supplement (PMC7508874; doi:10.1038/s41467-020-18466-w), 2020-09-22
Supplement: 41467_2020_18466_MOESM4_ESM.pdf [file 41467_2020_18466_MOESM4_ESM.pdf]

## **Description of Additional Supplementary Files**

### Supplementary Data 1

Group comparison result for WT, P2 vs P1

### Supplementary Data 2

Group comparison result for WT, P3 vs P1

### Supplementary Data 3

Group comparison result for WT, P3 vs P2

### Supplementary Data 4

Group comparison result for WT, P3 d6 vs d0

### Supplementary Data 5

Representative differentially expressed genes between P1, P2 and P3 in each cluster as heatmap of Figure 3b

### Supplementary Data 6

Summary for Geneset enrichment analysis (Figure 3b, 3d)

### Supplementary Data 7

Group comparison result (P2 vs P3) for the complete list for Growth Factors, ECM and inflammation (Figure 3c)

### Supplementary Data 8

Group comparison result for P1, ST2KO vs WT

### Supplementary Data 9

Group comparison result for P2, ST2KO vs WT

### Supplementary Data 10

Group comparison result for P3, ST2KO vs WT

### Supplementary Data 11

Summary for pathway enrichment analysis P2, ST2KO vs WT (Figure 6b)

### Supplementary Data 12

Summary for pathway enrichment analysis P3, ST2KO vs WT (Figure 6c)

### Supplementary Data 13

Group comparison result for the complete list for Growth Factors, ECM and immune response, P2 ST2KO vs WT (Figure 6d)

### Supplementary Data 14

Group comparison result for the complete list for Growth Factors, ECM and immune response, P3 ST2KO vs WT (Figure 6d)
